# A method of inferring partially observable Markov models from syllable sequences reveals the effects of deafening on Bengalese finch song syntax

Jiali Lu<sup>1†</sup>, Sumithra Surendralal<sup>2†</sup>, Kristofer E. Bouchard<sup>3,4</sup>, and Dezhe Z. Jin<sup>1\*</sup>

**1** Department of Physics and Center for Neural Engineering, The Pennsylvania State University, University Park, PA, USA

**2** Symbiosis School for Liberal Arts, Symbiosis International (Deemed University), Pune, Maharashtra, India

**3** Scientific Data Division and Biological Systems & Engineering Division, Lawrence Berkeley National Laboratory

**4** Helen Wills Neuroscience Institute & Redwood Center for Theoretical Neuroscience, UC Berkeley

† These authors contributed equally to the project

\* Corresponding author: Dezhe Z. Jin, dzj2@psu.edu

*Abbreviated title:* **POMMs for Bengalese finch songs**

*Conflict of Interest:* The authors declare no competing financial interests.

*Acknowledgements:* Research was supported by NSF award EF-1822476 (DZJ). The funders had no role in study design, data collection and analysis, decision to publish, or preparation of the manuscript

## 1 **Abstract**

2 Songs of the Bengalese finch consist of variable sequences of syllables. The sequences follow  
3 probabilistic rules, and can be statistically described by partially observable Markov models  
4 (POMMs), which consist of states and probabilistic transitions between them. Each state is  
5 associated with a syllable, and one syllable can be associated with multiple states. This multi-  
6 plicity of syllable to states association distinguishes a POMM from a simple Markov model, in  
7 which one syllable is associated with one state. The multiplicity indicates that syllable transi-  
8 tions are context-dependent. Here we present a novel method of inferring a POMM with minimal  
9 number of states from a finite number of observed sequences. We apply the method to infer  
10 POMMs for songs of six adult male Bengalese finches before and shortly after deafening. Before  
11 deafening, the models all require multiple states, but with varying degrees of state multiplicity  
12 for individual birds. Deafening reduces the state multiplicity for all birds. For three birds, the  
13 models become Markovian, while for the other three, the multiplicity persists for some syllables.  
14 These observations indicate that auditory feedback contributes to, but is not the only source of,  
15 the context dependencies of syllable transitions in Bengalese finch song.

## 16 **Author Summary**

17 Context dependencies are widely observed in animal behaviors. We devise a novel statistical  
18 method for uncovering context dependencies in behavioral sequences. Application of the method  
19 to songs of the Bengalese finch before and shortly after deafening reveals that auditory feedback  
20 contributes significantly to context dependencies, but is not the only source. Our approach can  
21 be applied to many other behavioral sequences and aid the discovery of the underlying neural  
22 mechanisms for context dependencies.

## 23 Introduction

24 Consisting of sequences of stereotypical syllables, birdsong has numerous parallels with human  
25 speech (Doupe and Kuhl, 1999). Syllable sequences of many songbird species are variable,  
26 and follow probabilistic rules (or syntax) that can be described with state transition models  
27 (Okanoya, 2004; Jin and Kozhevnikov, 2011; Jin, 2013; Markowitz et al., 2013). For Bengalese  
28 finch songs, it was shown that the syllable sequences are well described by partially observable  
29 Markov models (POMMs) (Jin and Kozhevnikov, 2011). In a POMM, the state transitions are  
30 Markovian: the transition probabilities between the states are fixed and do not depend on the  
31 history of the state transitions. Each state is associated with one syllable. This enables a POMM  
32 to generate syllable sequences through the state transitions. Although a state is associated with  
33 one syllable, the converse is not necessarily true. In a POMM, one syllable can be associated  
34 with multiple states. This multiplicity of syllable to states association enables a POMM to  
35 describe context dependences in syllable transitions: transition probabilities between syllables  
36 depends on the preceding syllable sequences (Jin and Kozhevnikov, 2011). The Markov model  
37 is a special case of POMM, in which there is one-to-one correspondence between the states and  
38 the syllables. Markov models are not capable of describing context dependencies in syllable  
39 transitions.

40 POMM is motivated by the idea that birdsong is driven by synaptic chains in the premotor  
41 nucleus HVC (proper name) of the song system (Hahnloser et al., 2002; Fee et al., 2004; Jun  
42 and Jin, 2007; Jin et al., 2007; Jin, 2009; Long et al., 2010; Wittenbach et al., 2015; Lynch et  
43 al., 2016; Picardo et al., 2016; Jin, 2013; Zhang et al., 2017; Egger et al., 2020; Tupikov and  
44 Jin, 2021). Specifically, the HVC neurons that project to the downstream motor areas form  
45 feedforward synaptic chain networks within HVC. Bursts of spikes propagate along a chain,  
46 with each projection neuron bursting once during the propagation, driving the production of  
47 one syllable through the projections to the downstream motor areas (Fee et al., 2004; Jin,  
48 2009). The activation of one such “syllable-chain” can be identified as the neural correlate of  
49 one state in a POMM (Jin, 2009; Jin and Kozhevnikov, 2011; Wittenbach et al., 2015). Within

50 this paradigm, inferring POMMs from observed syllable sequences can shed light on the neural  
51 dynamics in HVC that underlies production of variable syllable sequences.

52 Auditory feedback has been shown to affect Bengalese finch song syntax (Okanoya and  
53 Yamaguchi, 1997; Woolley and Rubel, 1997; Woolley and Rubel, 2002; Sakata and Brainard,  
54 2008; Wittenbach et al., 2015). A few days after deafening, the syllable sequences become  
55 more random (Okanoya and Yamaguchi, 1997; Woolley and Rubel, 1997), and the number  
56 of repetitions of long repeating syllables become smaller (Wittenbach et al., 2015). Altered  
57 auditory feedback to intact singing birds delivered at branching points of syllable transitions  
58 can change the transition probabilities (Sakata and Brainard, 2006; Sakata and Brainard, 2008).  
59 These observations demonstrate that auditory feedback could play an important role in creating  
60 context dependencies in syllable transitions in Bengalese finch song.

61 In this paper, we analyze the songs of six Bengalese finches before and shortly after deafening.  
62 We first devise a novel method for inferring a POMM from a set of observed syllable sequences.  
63 The method depends on the concept of *sequence completeness*, which is the total probability that  
64 the POMM generates all of the unique sequences in the observed set. Sequence completeness  
65 is further augmented with the differences of the probabilities of the unique sequences computed  
66 with the observed set or with the model, leading to the augmented sequence completeness,  $P_\beta$ .  
67 The method is designed to find the minimum number of states for each syllable such that  $P_\beta$  of  
68 the observed sequences is statistically compatible with the POMM. Compared to the previous  
69 heuristic method of inferring POMMs from observed syllable sequences (Jin and Kozhevnikov,  
70 2011), our new method is much simpler and more principled.

71 Using this method, we infer minimal POMMs for the syllable sequences of the birds before  
72 and after deafening. We show that deafening reduces the number of states required in the  
73 POMMs, indicating that deafening reduces context dependencies in the syllable transitions.  
74 Before deafening, the POMMs of all birds require multiple states for some syllables. After  
75 deafening, the POMMs are reduced to simple Markov models for three birds, while for the  
76 remaining three the multiplicity of the states persists for some syllables. Our results indicate that

77 auditory feedback contributes to context-dependent syllable transitions, but other mechanisms  
78 such as multiple syllable-chains encoding the same syllable should also contribute (Jin, 2009;  
79 Jin and Kozhevnikov, 2011; Cohen et al., 2020).

## 80 **Results**

81 In this paper, we analyze the dataset collected for a previous study (Wittenbach et al., 2015),  
82 which showed that syllable repeats in Bengalese finch songs, especially for those syllable types  
83 with a variable number of repeats, are best described as the re-activation of syllable-chains with  
84 auditory feedback, with the feedback strength reduced after each repetition (Wittenbach et al.,  
85 2015). In this work we focus on the non-repeat versions of the sequences, in which only the  
86 first syllable of any repetition is retained. For example, if the syllable sequence is *ABBBC*, the  
87 non-repeat version is *ABC*. In the rest of the paper, syllable sequences refer to the non-repeat  
88 versions.

89 Each syllable sequence is typically led by a variable number of introductory notes. These  
90 introductory notes are excluded in the analysis. All sequences have definite starts and ends.  
91 Thus the POMMs have two special states. One is the start state, from which all state transitions  
92 begin, and the other is the end state, at which all state transitions terminate. The POMMs are  
93 visualized with directed graphs (Fig. 1). Following the convention introduced previously (Jin  
94 and Kozhevnikov, 2011), we denote the start state as a pink oval marked with the symbol *S*.  
95 All other states are represented as ovals marked with associated syllables. The color of a state  
96 is cyan if it can transition to the end state, and is white otherwise. The end state is not shown  
97 in order to reduce clutter in the graph. State transitions are shown with arrows with transition  
98 probabilities written nearby. To reduce clutter, only transitions with probability  $P > 0.01$  are  
99 shown.

## 100 **Two types of context dependency**

101 Context dependencies in syllable transitions can take two forms. In one form, certain transitions  
102 are prohibited depending on the context. A simple example is that the observed set contains  
103 two unique sequences:  $ACD$  and  $BCE$ , each with probability 0.5 (Fig. 1, Example 1). The  
104 transition  $C \rightarrow D$  only occurs if  $C$  is preceded by  $A$ ; and the transition  $C \rightarrow E$  only occurs if  $C$   
105 is preceded by  $B$ . In other words, sequences  $ACE$  and  $BCD$  are unobserved. We call this form  
106 the *type I context dependence*.

107 In the other form, context dependence manifests in the probabilities. A simple example  
108 modified from Example 1 is that the observed set contains sequences  $ACD$ , with probability  
109 0.4;  $ACE$ , with probability 0.1;  $BCD$ , with probability 0.1; and  $BCE$ , with probability 0.4  
110 (Fig. 1, Example 2). The transitions  $C \rightarrow D$  and  $C \rightarrow E$  are observed regardless of the  
111 preceding syllable; however, the transition probabilities are different when  $A$  precedes  $C$  than  
112 when  $B$  precedes  $C$ . We call this form the *type II context dependence*.

113 With the two examples we show that sufficient state multiplicity is required for capturing  
114 context dependencies in syllable transitions. For Example 1, consider constructing the Markov  
115 model for the set of observed sequences, which only requires calculating the transition probabil-  
116 ities between the syllables. The graph of the Markov model is shown in Fig. 1. The sequences  
117 can start with either syllable  $A$  or  $B$  with equal probability, hence the start state transitions  
118 to the states associated with syllables  $A$  or  $B$  ( $A$ -state or  $B$ -state) with probability 0.5. These  
119 two states transition to the  $C$ -state with probability 1. Since  $C$  can be followed by either  $D$  or  
120  $E$ , the  $C$ -state transitions to the  $D$ -state or  $E$ -state with probability 0.5. From the start state,  
121 there are four possible state transition paths, generating four sequences  $ACD$ ,  $ACE$ ,  $BCD$ , and  
122  $BCE$ , each with probability 0.25. Thus the Markov model overgeneralizes, creating unobserved  
123 sequences  $ACE$  and  $BCD$ .

To characterize the overgeneralization of a POMM, we introduce the concept of *sequence completeness*  $P_c$ , which is defined as the total probability of the POMM generating all unique

sequences in the observed set:

$$P_c = \sum_{i=1}^M P_i,$$

124 where  $M$  is the number of unique sequences, and  $P_i$  is the probability of the  $i$ -th unique sequence.  
125 For Example 1, we have  $P_c = 0.5$ . The amount of overgeneralization is  $1 - P_c$ , which is the total  
126 probability of all unique sequences that the model can generate but are not in the observed set.  
127 The Markov model clearly does not capture the type I context dependence in the example. A  
128 more complex model has two states for syllable  $C$ , and the  $A$ -state and the  $B$ -state transition  
129 separately to these states (Fig. 1). This POMM generates two sequences  $ACD$  and  $BCE$  with  
130 probabilities 0.5 each, and  $P_c = 1$  for the observed set.

131 Because  $P_c$  is the total probability of all unique sequences in the set, it is insensitive to the  
132 probabilities of individual unique sequences. Consider the Markov model for Example 2, which is  
133 the same as in Example 1 (Fig. 1). The Markov model generates all observed unique sequences,  
134 hence  $P_c = 1$ . Although the model does not overgeneralize, it does not capture the type II  
135 context dependence in Example 2. To reveal this deficiency, we need to compare probabilities  
136 of the unique sequences between the model and the observation.

A simple measure of the differences of the transition probabilities is the total variation distance (Gibbs and Su, 2002), defined as

$$d = \frac{1}{2} \sum_{i=1}^M |P_{i,o} - P_{i,m}|.$$

Here

$$P_{i,o} = \frac{N_i}{N}$$

is the observed probability of the  $i$ -th unique sequence, and is the ratio of the copy number  $N_i$  of this sequence in the observed set of  $N$  sequences; and  $P_{i,m}$  is the normalized probability of

the sequence computed with the model

$$P_{i,m} = \frac{P_i}{P_c}.$$

The normalization is to ensure that

$$\sum_{i=1}^M P_{i,m} = 1,$$

137 which is required since we are comparing  $P_{i,m}$  to  $P_{i,o}$ , and  $\sum_{i=1}^M P_{i,o} = 1$ . For Example 2, the  
138 Markov model has  $d = 0.3$ . The model with two states for  $C$ , as shown in Fig. 1, can perfectly  
139 capture this type II context dependence with  $d = 0$ .

140 The total variation distance may not reveal type I context dependence. For Example 1, the  
141 Markov model generates the two observed sequences  $ACD$  and  $BCE$  with probabilities 0.25.  
142 However, after normalization the probabilities are 0.5. Hence we have  $d = 0$  for the Markov  
143 model.

To capture both type I and type II context dependence, we combine  $P_c$  and  $d$  into a single  
measure

$$P_\beta = (1 - \beta)P_c + \beta(1 - d),$$

144 where  $\beta$  is the weight given to the total variation distance, and is a number between 0 and 1.  
145 We call this quantity the *augmented sequence completeness*. In this paper we set  $\beta = 0.2$ . We  
146 find that this choice gives a good balance in discovering both types of context dependencies in  
147 syllable transitions. A perfect model would have  $P_\beta = 1$ .

## 148 **Neural correlates of state multiplicity**

149 Within the framework of syllable-chains in HVC, it is natural to assume that the multiple  
150 states associated with one syllable correspond to multiple syllable-chains in HVC that drive the  
151 production of the same syllable (Jin, 2009; Cohen et al., 2020). In Example 1 discussed above,  
152 the POMM that fits the observed sequences has two states for syllable  $C$ . With two syllable-



153 chains for  $C$ , the sequences  $ACD$  and  $ACB$  can be wired into two separate chains, as shown in  
154 Fig. 2a. This is the *intrinsic mechanism* for the state multiplicity in POMMs. This mechanism  
155 can account for the type II context dependence in Example 2 by introducing weaker connections  
156 from the end of the syllable-chain for  $C$  in  $ACD$  to the start of the syllable-chain for  $E$ , and  
157 from the end of the syllable-chain for  $C$  in  $BCD$  to the start of the syllable-chain for  $D$ , since  
158 the transition probabilities depend on the connection strength (Jin, 2009).

159 An alternative mechanism uses auditory feedback. In this case there is one syllable-chain for  
160  $C$ , which connects to the syllable-chains for  $D$  and  $E$ . However, the activations of the syllable-  
161 chains for  $D$  and  $E$  are determined by the refferent auditory inputs (Sakata and Brainard, 2006;  
162 Sakata and Brainard, 2008; Hanuschkin et al., 2011; Wittenbach et al., 2015). The auditory  
163 feedback from syllable  $A$  is sent to the syllable-chain for  $D$ ; while the auditory feedback from  
164 syllable  $B$  is sent to the syllable-chain for  $E$  (Fig. 2b). The auditory inputs can bias the  
165 transitions from syllable-chain  $C$  to syllable-chains  $D$  and  $E$  (Jin, 2009; Hanuschkin et al., 2011;  
166 Wittenbach et al., 2015). With strong enough auditory inputs, the probability of transition from  
167  $C$  to  $D$  should approach 1 when  $C$  is preceded by  $A$ . When  $C$  is preceded by  $B$ , the transition  
168 probability to  $D$  should approach 0. This is the *refferent mechanism* for the state multiplicity.

169 These two mechanisms have different predictions for the effects of deafening. The intrinsic  
170 mechanism predicts that that the state multiplicity remains unchanged after deafening. The  
171 refferent mechanism predicts that all state multiplicity disappears after deafening, and the  
172 song syntax will become Markovian. These predictions can be tested by inferring POMMs for  
173 the observed syllable sequences before and shortly after deafening.

## 174 **Statistical test of POMM**

175 To find the POMM that is compatible with the observed set of syllable sequences, we need to  
176 devise a way of statistically evaluating the validity of the POMM. This problem can be cast  
177 as hypothesis test, in which the null hypothesis is that the observed set is generated by the  
178 POMM. We can use  $P_\beta$  for this purpose. Ideally,  $P_\beta$  of the observed set computed with the

179 POMM should be 1, which indicates that the POMM generates all of the unique sequences  
180 in the observed set, and importantly, does not generate unobserved sequences; moreover, the  
181 probabilities of the unique sequences agree with the observations. In practice, due to the finite  
182 number  $N$  of sequences observed, it is possible that the observed set does not contain all possible  
183 sequences that the bird is capable of producing. Therefore,  $P_c < 1$  could be due to the smallness  
184 of  $N$ , and not because the model overgeneralizes. Additionally, mismatch in the probabilities of  
185 the unique sequences could be due to the inaccurate measurements of the transition probabilities  
186 when  $N$  is finite.

187 To take into account the finite  $N$  effect, we generate random sets of  $N$  sequences from the  
188 POMM. For each generated set, we compute  $P_\beta$  with the POMM. The  $P_\beta$  distribution of the  
189 generated sets can be used to gauge the likelihood that the  $P_\beta$  of the observed set is drawn from  
190 the distribution. Specifically, we compute the probability  $p$  that the observed  $P_\beta$  is greater than  
191 the  $P_\beta$  of the generated sets. If  $p < 0.05$ , we conclude that the observed  $P_\beta$  is not likely drawn  
192 from the distribution, and the POMM is not likely the model that generates the observed set. If  
193  $p > 0.05$ , the POMM is not statistically rejected and it is compatible with the observed set. In  
194 this work, we build the  $P_\beta$  distribution by generating 10000 random sets of  $N$  sequences from  
195 the POMM.

196 We illustrate this process with an example. In Fig. 3a, we show the “ground truth model”.  
197 It has 2 states for syllables  $A$  and  $C$ , and one state for each of syllables  $B, D, E$ . The model  
198 generates 7 unique sequences:  $A$ , probability 0.1;  $ACD$ , probability 0.36;  $ACE$ , probability 0.04;  
199  $BCD$ , probability 0.05;  $BCE$ , probability 0.2;  $BAE$ , probability 0.125; and  $BA$ , probability  
200 0.125. From the model, we generate three sets of “observed sequences” with  $N = 10$ ,  $N = 30$   
201 and  $N = 60$ , as shown in the figure. Sequences generated from the ground truth model contain  
202 both type I and type II context-dependent syllable transitions.

203 We construct Markov models from the observed sets by computing the probabilities of start-  
204 ing or ending at each syllable, and the probabilities of transitioning from one syllable to another.  
205 The Markov models are shown in Fig. 3b. We generate 10000 random sets of  $N$  sequences from

206 the Markov models, and compute  $P_\beta$  of these generated sets with the Markov model. The distri-  
207 butions of  $P_\beta$  are shown below the Markov models in Fig. 3b. The distributions shift towards 1  
208 as  $N$  increases (Fig. 3b). We then calculate the  $P_\beta$  of the observed sets with the Markov models  
209 and indicate the values with red lines in Fig. 3b. The p-value is computed as the probability  
210  $p$  that the observed  $P_\beta$  is greater than the  $P_\beta$  of the generated sets. In the examples shown in  
211 Fig. 3b, the p-values are  $p = 0.12$  for  $N = 10$ ;  $p = 0.002$  for  $N = 30$ ; and  $p = 0$  for  $N = 60$ .

212 We run this process for 100 observed sets generated from the ground truth model for each  
213  $N$ , and compute the p-value distributions. For  $N = 10$ , we find that  $p = 0.27 \pm 0.28$ ; for  $N = 30$ ,  
214  $p = 0.008 \pm 0.016$ ; and for  $N = 60$ ,  $p = 5 \times 10^{-6} \pm 3.2 \times 10^{-5}$ . Therefore, for  $N = 30$  and  $N = 60$ ,  
215 the Markov model can be rejected based on the  $p < 0.05$  criterion. For  $N = 10$ , however, the  
216 Markov model cannot be rejected, even though the ground truth model is non-Markovian.

217 If the ground truth model is Markovian, increasing  $N$  does not lead to rejection of the  
218 Markov model, as expected (supplementary Fig. S1). Although we used the Markov model as  
219 an example, this process of statistical testing based on  $P_\beta$  can be applied to any POMM.

## 220 **Inferring POMM from observed sequences**

221 Given a set of observed syllable sequences, we infer a POMM that is statistically compatible with  
222 the set. We also require that the POMM is a minimal model, such that the number of states  
223 for each syllable is as small as possible, and the transitions between the states are sparse. This  
224 is achieved through a procedure that consists of grid search in the state space, state reduction,  
225 and pruning of transitions between the states. We illustrate this procedure through the example  
226 shown in Fig. 3a.

227 A POMM is determined by the number of states for each syllable, and the transition prob-  
228 abilities between the states. All possible POMMs thus can be represented as grid points in the  
229 state space. For example, the grid point (1, 1, 1, 1, 1) represents the POMM with syllables  
230  $A, B, C, D, E$  each having one state, which is the Markov model; and the grid point (2, 2, 2,  
231 2, 2) represents the POMM with two states for each syllable. At each grid point, we find the

232 transition probabilities between the states by maximizing the likelihood that the model gener-  
233 ates the observed sequences using the Baum-Welch algorithm (Rabiner, 1989). To avoid local  
234 minima that the algorithm may encounter, we consider 100 runs of the algorithm with random  
235 seeds, and select the run with the largest likelihood.

236 The search starts with the Markov model, the grid point  $(1, 1, 1, 1, 1)$ . The model is  
237 evaluated with the stopping criterion that it passes the  $P_\beta$  based statistical test with  $p > 0.05$ ,  
238 as discussed above (Fig. 3). If the model does not satisfy the stopping criterion, the nearby  
239 grid points  $(2, 1, 1, 1, 1)$ ,  $(1, 2, 1, 1, 1)$ ,  $(1, 1, 2, 1, 1)$ ,  $(1, 1, 1, 2, 1)$ , and  $(1, 1, 1, 1, 2)$   
240 are accessed. Among them, the grid point with the largest likelihood is selected. If this newly  
241 selected point does not satisfy the stopping criterion, the search moves on to its nearby grid  
242 points. The process iterates until the stopping criterion is satisfied.

243 It is possible that the search ends up with a more complex POMM than needed because  
244 the path is guided by local information on the grid. We therefore test reducing the POMM by  
245 deleting states, which is the reverse process of the grid search. Specifically, for all syllables with  
246 multiple states, we delete one state for each. We select the deletion with the largest likelihood,  
247 and test whether the reduced POMM satisfies the stopping criterion. If the stopping criterion  
248 is satisfied, we go on to the next round of deletions. The process continues until the reduced  
249 POMM is rejected. The last deletion is then reversed.

250 After state reduction, we simplify the transitions between the states in the POMM. We  
251 systematically cut every transition and recalculate the maximum likelihood of the observed se-  
252 quences. If the likelihood is larger than a threshold, the cut is accepted; otherwise the transition  
253 is retained. The threshold is set to the maximum likelihood of the POMM before cuts minus  
254 an estimate of the fluctuation of the likelihood due to inaccuracies in computing the likelihood,  
255 which is set to be the standard deviation of the likelihood in the 100 runs of the Baum-Welch  
256 algorithm with random seeds before the cuts. If the POMM after the accepted cuts no longer  
257 satisfy the stopping criterion, the threshold is raised and the cuts are redone.

258 We show the accuracy of the above procedure by inferring POMMs from 100 sets of  $N$

259 observed sequences generated from the ground truth model (Fig. 3a). The results for  $N =$   
260 10, 30, 90 are shown in Fig. 4. We display typical POMMs inferred, and the distributions of  
261 the total number of states in the POMMs inferred from the 100 sets. For  $N = 10$ , the total  
262 number of states is mostly 5, and the Markov model is accepted. This is because for most sets  
263 of  $N = 10$ , the Markov model passes the statistical test (Fig. 3b). Some models have 4 states  
264 because syllables  $D$  or  $E$  may not appear in the observed sequences due to the small  $N$ . For  
265  $N = 30$ , the total number of states ranges from 5 to 7. Typical POMMs with 6 states are shown  
266 in the figure. For  $N = 90$ , the total number of states is mostly 7, and the inferred POMMs have  
267 the same structure as the ground truth model.

268 This example shows that our procedure tends to fit a simpler POMM when the number of  
269 observed sequences is small. When the number is large, the procedure uncovers the ground  
270 truth model. Crucially, the procedure does not create more complex models than the ground  
271 truth model.

## 272 **Effects of deafening on the POMM syntax of Bengalese finch songs**

273 To see how auditory input affects the POMM syntax, we analyze songs of 6 adult Bengalese  
274 finches before and two days after deafening. The dataset was used previously for analyzing  
275 syllable repeats (Wittenbach et al., 2015). Here we focus on the non-repeat versions of the  
276 syllable sequences.

277 We first test if Markov models are statistically compatible with the observed syllable se-  
278 quences using the  $p > 0.05$  criterion. The results are shown in Fig. 5 for o10bk90, and in S2-S6  
279 for the other five birds. Three birds have non-Markovian syntax before and after deafening  
280 (o10bk90, normal  $p = 0$ , deafened  $p = 0$ , Fig. 5; bfa16, normal  $p = 0$ , deafened  $p = 0$ , Fig. S3;  
281 o46bk78, normal  $p = 0$ , deafened  $p = 0$ , Fig. S6). The other three birds have non-Markovian  
282 syntax before deafening, but after deafening the Markovian syntax is not statistically rejected  
283 (bfa7, normal  $p = 0$ , deafened  $p = 0.42$ , Fig. S2; bfa14, normal  $p = 0$ , deafened  $p = 0.56$ , Fig. S5;  
284 bfa19, normal  $p = 0.02$ , deafened  $p = 0.34$ , Fig. S4). These results suggest that deafening re-

285 duces Bengalese finch song syntax from non-Markovian to Markovian for some birds but not for  
286 all.

287 Deafening also creates novel transitions between syllables, as well as novel starting and  
288 ending syllables. The transition probabilities of these novel transitions tend to be small (median  
289  $P = 0.04$ ), but 22% have probabilities larger than 0.1 (18 transitions out of 81). The majority  
290 of these novel transitions appear in two birds (27 for bfa14; 21 for bfa19). A small number (8)  
291 of transitions also disappear after deafening (median  $P = 0.02$ ).

292 As observed in previous studies (Woolley and Rubel, 1997; Okanoya and Yamaguchi, 1997),  
293 deafening increases sequence variability. The variability of transitions from a given syllable  $i$  (or  
294 the start state) is quantified with the transition entropy as  $S_i = -\sum_{j=1}^M p_{ij} \log_2 p_{ij}$ , where  $M$  is  
295 the number of branches of the transitions, and  $p_{ij}$  is the probability of the  $j$ -th branch. If  $M = 1$ ,  
296 the transition is stereotypical, and we have  $S_i = 0$ . For a given  $M$ , the entropy is maximum  
297 if the transition probabilities for all branches are equal. This maximum entropy increases with  
298  $M$ . The median of transition entropies is significantly larger after deafening (median, 0.95, s.d.,  
299 0.55) than before (median, 0.35, s.d., 0.51;  $p = 5 \times 10^{-6}$ , Wilcoxon signed-rank one-sided test).  
300 The number of branches  $M$  is also significantly larger after deafening (median, 4, s.d., 1.5) than  
301 before (median, 2, s.d., 0.90;  $p = 9.8 \times 10^{-7}$ , Wilcoxon signed-rank one-sided test).

302 We next construct POMMs from the observed syllable sequences before and after deafening.  
303 The inferred POMMs are shown in Figs. 6-11. In normal hearing condition, there are 44 syllables  
304 in the songs of the birds; among them, 25 require 1 state, 14 require 2 states, 2 require 3 states,  
305 and 3 require 4 states. So most syllables require 1 or 2 states. There are 77 states in the  
306 POMMs. Counting only transition branches with probabilities greater than 0.01, the majority  
307 of states have up to 3 outgoing branches (32, 29, 13 for branch numbers 1, 2, 3, respectively).

308 After deafening, there are 43 syllables (syllable  $g$  for bfa7 drops out after deafening). Most  
309 syllables (40) require only 1 state, and the remaining 3 require 2 states. There are 52 states  
310 in the POMMs. Counting only the transition branches with probability greater than 0.01, the  
311 branch numbers range from 1 to 7, with counts 2, 19, 7, 13, 6, 3, 2, respectively.

312 Deafening significantly reduces the state multiplicity, as measured by the number of extra  
313 states (defined as the number of states for the syllables minus the number of the syllables)  
314 (Fig. 12a, the Wilcoxon signed-rank one-sided test,  $p = 0.016$ ). The mean normalized transition  
315 entropy between the states (transition entropy divided by  $\log_2 M$ , where  $M$  is the number of  
316 transitions from the state) is significantly larger after deafening for all but one bird (Wilcoxon  
317 signed-rank one-sided test,  $p = 0.03$ , tested with all birds). Thus, deafening reduces the com-  
318 plexity of song syntax, as indicated by the reduction of the extra number of states required.  
319 Additionally, transitions between the states become more random.

320 The POMMs reveal context dependencies in the syllable transitions. In the following, we  
321 show such dependencies for each bird before and after deafening. We first show the major  
322 syllable transitions in the observed sets. We then point out how reducing the state multiplicity  
323 by merging states associated with the same syllable makes the POMM overgeneralize or produce  
324 some subsequences with enhanced probabilities. This merging technique is inspired by the  
325 example shown in Fig. 1. The state-merged POMM retains all state transition branches of  
326 the original POMM, but the transition probabilities are re-calculated with the Baum-Welch  
327 algorithm using the sequences in the observed sets.

328 For each state-merged POMM, we use one or two selected subsequences for evaluation. We  
329 first calculate  $P_s$  of the subsequence in the observed set, defined as the fraction of sequences  
330 in the set that contain the subsequence. We then generate 10000 sets of  $N$  sequences from  
331 the POMM, where  $N$  is the number of sequences in the observed set. For each generated set,  
332 we compute  $P_s$ . This creates a distribution of  $P_s$ . We report the median value of  $P_s$  in this  
333 distribution to show how much the probability is enhanced. The significance of the enhancement  
334 is shown with the p-value, which is the probability  $p$  that  $P_s$  in the distribution is smaller than  
335 the observed  $P_s$ . The process is analogous to the test of POMMs shown in Fig. 3.

336 For o10bk90 in normal hearing condition, syllables  $f$  and  $g$  are represented by two states  
337 each, reflecting the following context dependence of syllable transitions (Fig. 6):

338 
$$e \longrightarrow f_1 \longrightarrow g_1 \longrightarrow \square ,$$

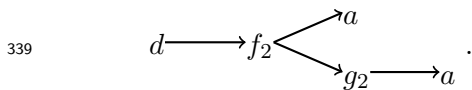

340 Here  $\square$  denote the end of the sequence, and the subscripts indicate different states for the same  
 341 syllable. Merging  $f_1$  and  $f_2$  creates a subsequence

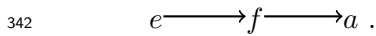

343 This subsequence is unobserved, i.e.  $P_s = 0$  in the observed set. From the distribution of  $P_s$   
 344 generated from the state-merged POMM we find that the median  $P_s = 0.13$  and  $p = 0.0001$ ,  
 345 showing that the enhancement of  $P_s$  after merging the states is significant at the  $\alpha = 0.05$  level.

346 In the observed set, the subsequence

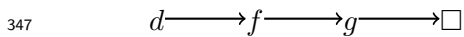

348 is rare ( $P_s = 0.016$ ). Merging  $g_1$  and  $g_2$  significantly increases the probability, with median  
 349  $P_s = 0.27$  and  $p = 0$ .

350 After deafening, transition  $S \rightarrow d$  is weakened, where  $S$  is the start state; and transitions  
 351  $S \rightarrow a$  and  $S \rightarrow g$  become stronger (Fig. 6). The state multiplicity for  $f$  persists, reflecting the  
 352 context dependent transitions

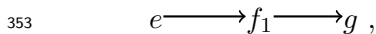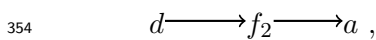

355 which is the same as before deafening. As in normal hearing condition, merging  $f_1$  and  $f_2$  creates  
 356 unobserved subsequence

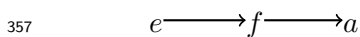

358 with median  $P_s = 0.12$  and  $p = 0$ . The subsequence  $d \rightarrow f \rightarrow g$  becomes rare after deafening  
 359 ( $P_s = 0.5$ , before deafening;  $P_s = 0.007$ , deafened), indicating that deafening makes the transi-  
 360 tion  $f_2 \rightarrow g_2$  rare. Syllable  $g$  is now represented with one state only, because this does not make  
 361 the subsequence  $d \rightarrow f \rightarrow g \rightarrow \square$  more frequent than observed, unlike in the normal hearing  
 362 condition.

363 For bfa7 with normal hearing, syllable  $b$  has 2 states and syllables  $c$  and  $d$  have 4 states each  
 364 (Fig. 7). The two states for  $b$  encode the following context dependence:



| states merged | subsequence | $P_s$ observed | median $P_s$ | $p$    |
|---------------|-------------|----------------|--------------|--------|
| $b_1, b_2$    | $abcdg$     | 0              | 0.07         | 0.004  |
| $c_1, c_2$    | $fc dg$     | 0              | 0.11         | 0      |
| $c_1, c_3$    | $bc dcb$    | 0              | 0.04         | 0.0065 |
| $c_1, c_4$    | $fc db$     | 0              | 0.07         | 0.0003 |
| $c_2, c_3$    | $abcdg$     | 0              | 0.04         | 0.0071 |
| $c_2, c_4$    | $bc db$     | 0              | 0.04         | 0.007  |
| $c_3, c_4$    | $bc db$     | 0              | 0.04         | 0.0078 |
| $d_1, d_2$    | $fc dg$     | 0              | 0.11         | 0      |
| $d_1, d_3$    | $bc dcb$    | 0              | 0.04         | 0.0078 |
| $d_1, d_4$    | $fc db$     | 0              | 0.07         | 0.0001 |
| $d_2, d_3$    | $abcdg$     | 0              | 0.04         | 0.0062 |
| $d_2, d_4$    | $bc db$     | 0              | 0.04         | 0.0066 |
| $d_3, d_4$    | $bc db$     | 0              | 0.04         | 0.0069 |

Table 1: Consequences of pairwise merging of states with the same syllables for bfa7 with normal hearing. Listed are the pair of states merged, subsequences examined,  $P_s$  of the subsequences in the observed set, median of the  $P_s$  distribution generated from the state-merged POMMs, and the p-value.

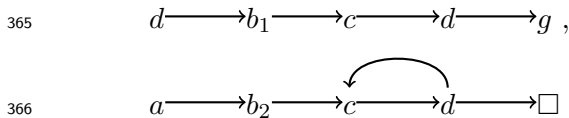

367 The state multiplicity for  $c$  and  $d$  reflects the following context dependencies:

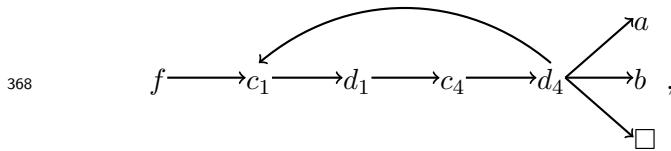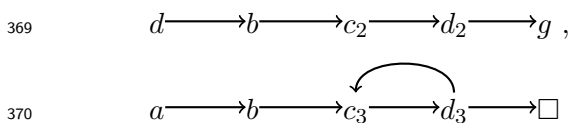

371 The consequences of merging states are summarized in Table 1.

372 Deafening leads to the appearance of  $c \rightarrow a$  and  $h \rightarrow a$  transitions, strengthening of  $d \rightarrow a$   
 373 transition, and disappearance of  $d \rightarrow c$  transition. Except for  $b$ , the sequence can now stop  
 374 at all syllables. Interestingly, the  $d \rightarrow g$  transition is lost and syllable  $g$  does not appear after  
 375 deafening. The syntax is Markovian, suggesting that there is no context dependence.

376 For bfa16 in normal hearing condition, there are two states for syllables  $a$ ,  $d$ , and  $e$  (Fig. 8).

377 The two states for  $a$  encode the following context dependence:

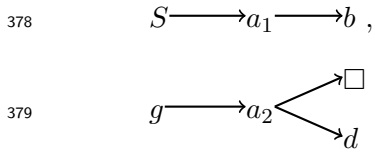

380 Merging  $a_1$  and  $a_2$  creates an unobserved subsequence

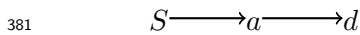

382 with median  $P_s = 0.19$  and  $p = 0$ . The two states for  $d$  encodes the following context dependence:

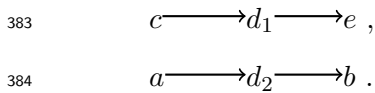

385 Merging  $d_1$  and  $d_2$  creates an unobserved subsequence

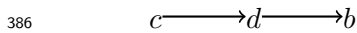

387 with median  $P_s = 0.22$  and  $p = 0$ . The two states for  $e$  encodes the context dependence

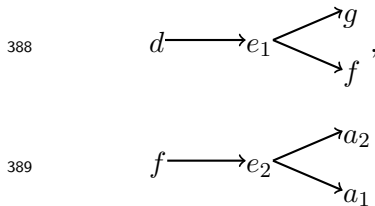

390 Merging  $e_1$  and  $e_2$  creates unobserved subsequence

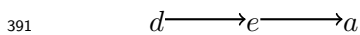

392 with median  $P_s = 0.38$  and  $p = 0$ .

393 The major effects of deafening are the loss of the transition  $e_2 \rightarrow a_2$ ; the strengthening of the  
 394 transition  $e_2 \rightarrow a_1$ ; and the enhancement of stopping after  $g$ . The only state multiplicity left is  
 395 for syllable  $e$ , which encodes the same context dependency as in the normal hearing condition.

396 Merging the two states for  $e$  again creates unobserved subsequence  $d \rightarrow e \rightarrow a$  with median  
 397  $P_s = 0.05$  and  $p = 0$ .

398 For bfa19 in normal hearing condition, there are two states for syllables  $b$ ,  $c$ ,  $e$ , and  $f$  (Fig. 9).

399 The state multiplicity for  $b$  and  $c$  encodes the context dependence

| states merged | subsequence | $P_s$ observed | median $P_s$ | $p$    |
|---------------|-------------|----------------|--------------|--------|
| $b_1, b_2$    | $abc f$     | 0              | 0.38         | 0.0001 |
| $c_1, c_2$    | $abc f$     | 0              | 0.38         | 0      |
| $e_1, e_2$    | $de bcd$    | 0              | 0.29         | 0.0015 |
| $f_1, f_2$    | $gf g$      | 0              | 0.29         | 0.0011 |

Table 2: Consequences of pairwise merging of states with the same syllables for bfa19 with normal hearing.

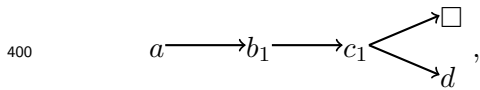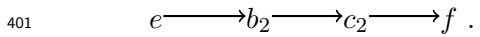

402 The state multiplicity for  $e$  and  $f$  reflects the context dependency

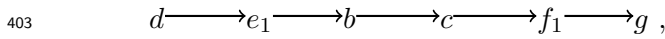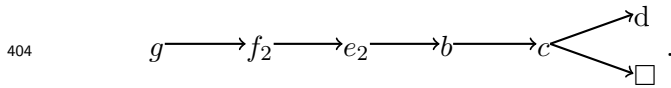

405 The consequences of pairwise state merging are shown in Table 2.

406 After deafening, many novel transitions appear, most notably  $e \rightarrow g$  and  $f \rightarrow g$  transitions.

407 The model becomes Markovian, and all context dependencies disappear.

408 For bfa14 in normal hearing condition, the POMM has two states for  $c$  and  $g$  (Fig. 10),

409 reflecting context dependence

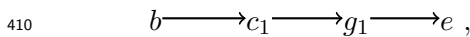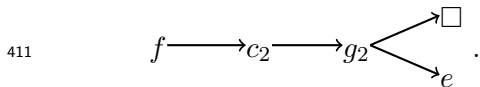

412 Subsequence

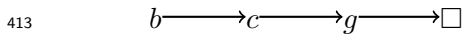

414 is rare in the observed sequences ( $P_s = 0.03$ ). Merging  $c_1$  and  $c_2$  significantly boosts the

415 probability, with median  $P_s = 0.23$  and  $p = 0$ . Merging  $g_1$  and  $g_2$  does the same, with median

416  $P_s = 0.08$  and  $p = 0.013$ .

417 For this bird, deafening creates numerous novel transitions with small probabilities ( $< 0.1$ )

418 (Fig. 10). Novel transitions with large probability ( $> 0.1$ ) also occur, which include transitions  
 419  $a \rightarrow h$ ,  $b \rightarrow l$ ,  $h \rightarrow f$ , and  $l \rightarrow g$ , as well as from  $S$  to syllables  $b, c, e, f, l$ . Some transitions are  
 420 weakened, which include transitions  $l \rightarrow c$  and  $f \rightarrow c$ . The model becomes Markovian.

421 For o46bk78 with normal hearing, the song is described by a POMM with state multiplicity  
 422 for multiple syllables (Fig. 11). There are 4 states for  $b$ , 3 states for  $a$  and  $c$ , and 2 states for  $d$  and  
 423  $e$ , respectively. The state multiplicity for syllable  $a$  reflects the following context dependencies:

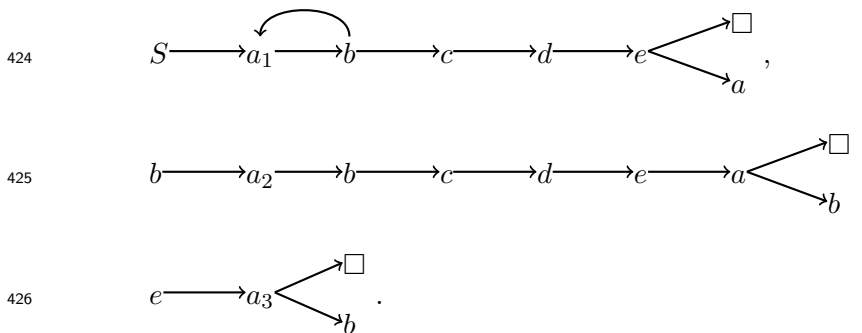

427 The state multiplicity for syllable  $b$  reflects the following context dependencies:

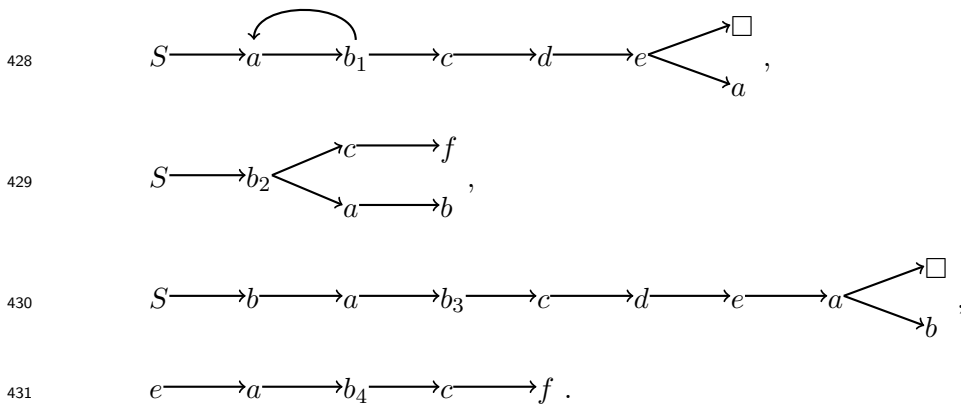

432 The state multiplicity for syllable  $c$  and  $d$  encodes the following context dependencies:

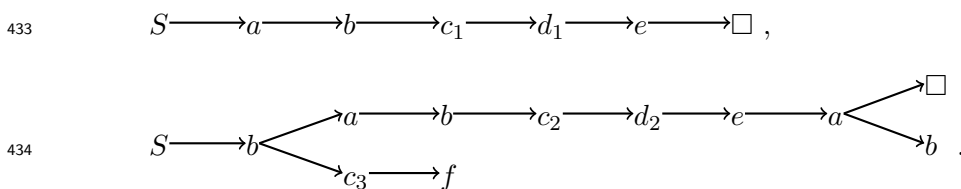

435 The consequences of pairwise merging of states are shown in Table 3.

436 After deafening, a novel transition  $d \rightarrow a$  appears. Moreover, the probability of stopping  
 437 after syllable  $a$  is strongly enhanced. State multiplicity disappears except for syllable  $b$ , which

| states merged | subsequence      | $P_s$ observed | median $P_s$ | $p$    |
|---------------|------------------|----------------|--------------|--------|
| $a_1, a_2$    | <i>Sabcdea</i> □ | 0              | 0.04         | 0.029  |
| $a_1, a_3$    | <i>Sa</i> □      | 0              | 0.06         | 0.014  |
| $a_2, a_3$    | <i>ba</i> □      | 0              | 0.027        | 0      |
| $b_1, b_2$    | <i>Sbcd</i>      | 0.01           | 0.09         | 0.01   |
| $b_1, b_3$    | <i>Sabcdea</i> □ | 0              | 0.04         | 0.03   |
| $b_1, b_4$    | <i>Sabcf</i>     | 0              | 0.07         | 0.0058 |
| $b_2, b_3$    | <i>babab</i>     | 0              | 0.14         | 0      |
| $b_2, b_4$    | <i>eaba</i>      | 0.03           | 0.17         | 0      |
| $b_3, b_4$    | <i>abcf</i>      | 0.03           | 0.23         | 0      |
| $c_1, c_2$    | <i>Sabcdea</i> □ | 0              | 0.04         | 0.035  |
| $c_1, c_3$    | <i>Sabcf</i>     | 0              | 0.07         | 0.005  |
| $c_2, c_3$    | <i>abcf</i>      | 0              | 0.3          | 0      |
| $d_1, d_2$    | <i>Sabcdea</i> □ | 0              | 0.04         | 0.025  |

Table 3: Consequences of pairwise merging of states with the same syllables for o46bk78 with normal hearing.

438 is still associated with two states, reflecting the context dependent transitions

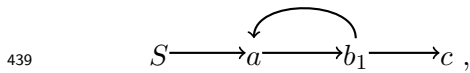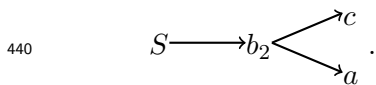

441 This is a type II context dependence. In both cases, syllable  $b$  is followed by syllable  $a$  or  $c$ .

442 However, from  $b_1$  the transition to  $c$  is favored, with probability 0.88; in contrast, from  $b_2$  the

443 transition to  $a$  is favored with probability 0.77. In the observed set, the subsequences

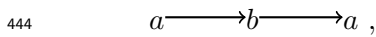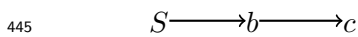

446 occur with probabilities  $P_s = 0.21$  and  $P_s = 0.19$ , respectively. Merging  $b_1$  and  $b_2$  significantly

447 enhances the probabilities, with median  $P_s = 0.37$  and  $p = 0.001$  for the first subsequence and

448 with median  $P_s = 0.56$  and  $p = 0$  for the second subsequence.

## 449 Discussion

450 Deafening induces rapid changes in syllable sequences in Bengalese finch songs (Woolley and  
451 Rubel, 1997; Okanoya and Yamaguchi, 1997; Wittenbach et al., 2015). In this work we analyze  
452 the changes in song syntax by inferring minimal POMMs from syllable sequences. The multi-  
453 plicity of states in the POMMs reveal context dependencies in syllable transitions (Jin, 2009;  
454 Jin and Kozhevnikov, 2011). We find that deafening reduces the state multiplicity but does  
455 not eliminate it. Our results indicate that intact auditory feedback plays an important but not  
456 exclusive role in creating context dependencies in Bengalese finch songs.

457 Previous deafening studies in the Bengalese finch emphasized the loss of sequence stereotypy  
458 shortly after deafening and suggested that online auditory feedback is required for producing  
459 stereotyped syllable sequences (Woolley and Rubel, 1997; Okanoya and Yamaguchi, 1997). We  
460 confirm that deafening makes syllable sequences more random. However, an alternative explana-  
461 tion could be that the activity of the auditory system becomes more random after being deprived  
462 of inputs (Resnik and Polley, 2021). We find that deafening leads to the appearance of many  
463 novel transitions with small probabilities ( $< 0.1$ ). Novel transitions with large probability also  
464 occur, but are less frequent. Some transitions with small probabilities disappear after deafening.  
465 The appearance (and disappearance) of transitions with small probabilities is consistent with  
466 the idea that the HVC activity is more random after deafening. NIf (the nucleus interfaccialis  
467 of the nidopallium) is a major source of auditory inputs to HVC (Coleman and Mooney, 2004).  
468 During sleep, NIf activity drives random activations of HVC projection neurons (Hahnloser and  
469 Fee, 2007). It is conceivable that deafening deprives structured auditory inputs to NIf, and  
470 causes NIf to be randomly active during singing. Lesioning NIf in the Bengalese finch makes  
471 song sequences more stereotyped (Hosino and Okanoya, 2000), which suggests that NIf input is  
472 capable of influencing syllable transitions.

473 On average across the birds, the transition entropy at the branching points of syllable tran-  
474 sitions tends to increase after deafening (Fig. 12b). This increase is mostly due to the branching  
475 points that have dominant transitions becoming more “equalized”, such that the branches have

476 similar transition probabilities. Similar effects were seen in real-time manipulation of auditory  
477 feedback (Sakata and Brainard, 2006), cooling HVC (Zhang et al., 2017) or enhancing inhibition  
478 (Isola et al., 2020) in HVC of the Bengalese finch. It would be interesting to investigate whether  
479 there is a common neural mechanism across these manipulations.

480 In the framework of syllable-chains driving syllable productions (Hahnloser et al., 2002;  
481 Fee et al., 2004; Jin, 2009; Chang and Jin, 2009), transitions between syllable-chains are con-  
482 trolled by both the connections between the syllable-chains and the auditory inputs to the  
483 HVC projection neurons (Jin, 2009; Hanuschkin et al., 2011; Wittenbach et al., 2015). Strong  
484 auditory inputs can bias transitions towards the targeted branches. Context dependence can  
485 thus be encoded with many-to-one mapping from the syllable-chains to syllables (Jin, 2009;  
486 Cohen et al., 2020), or with the auditory feedback promoting different transitions depending on  
487 the preceding syllables (Fig. 2). These intrinsic and reafferent mechanisms can coexist. Deaf-  
488 ening reduces context dependence, as indicated by the reduction of the state multiplicity in the  
489 POMMs after deafening. The state multiplicity remains for some syllables in some birds, sug-  
490 gesting the existence of the intrinsic mechanism. Additionally, because the delay of the auditory  
491 feedback is limited to about 70 - 90 ms (Sakata and Brainard, 2006), context dependence span-  
492 ning many syllables is unlikely due to auditory feedback (Cohen et al., 2020). There are alterna-  
493 tive frameworks on how syllables are driven by the song system in songbirds (Amador et al., 2013;  
494 Hamaguchi et al., 2016; Troyer et al., 2017). It would be interesting to show how these frame-  
495 works can explain our observations on the context-dependent syllable transitions in Bengalese  
496 finch songs.

497 Our method of inferring a POMM from observed sequences is conservative. The method  
498 is designed to find the minimal POMM given the observed sequences. When the number of  
499 observed sequences is small, the method tends to underestimate the true number of multiple  
500 states (Fig. 4). This is because not all context dependencies are sufficiently represented in the  
501 observed sequences. One way to gauge whether there are enough number of observed sequences  
502 is to see if the sequence completeness  $P_c$  computed with the POMM is close to 1 for the observed

503 sequences. The quantity  $1 - P_c$  can be used as a rough estimate of the total probability of the  
504 missing unique sequences.

505 We identify two types of context dependencies. Simple models that are incapable of capturing  
506 type I context dependencies overgeneralize, creating unobserved sequences. This is captured with  
507  $P_c$ . In the case of sufficient number  $N$  of observed sequences,  $1 - P_c$  is the total probability of  
508 the unobserved sequences. A perfect model should have  $P_c = 1$ . However, a model could have  
509  $P_c = 1$  but still miss type II context dependencies, which describe how transition probabilities  
510 change depending on the preceding syllables. This type can be captured by the total variation  
511 distance  $d$ , which is the sum of the differences of the model's and the observed probabilities  
512 of the unique sequences in the observed set. To capture both types of context dependencies,  
513 we combine  $P_c$  and  $d$  with a parameter  $\beta$  into the augmented sequence completeness  $P_\beta$ . An  
514 ideal model should have  $P_\beta = 1$ . Accurate measurements of the sequence probabilities require  
515 large  $N$ . If  $N$  is small, type II context dependencies may be obscured by the fluctuations in the  
516 measured probabilities. In this case it is better to de-emphasize the contribution of  $d$  by setting  
517  $\beta$  close to 0. We find that setting  $\beta = 0.2$  is a reasonable choice for our data set. Because  
518  $P_c$  is the sum of the probabilities of the unique sequences, it is more robust against inaccurate  
519 measurements of the probabilities.

520 The method depends on the distribution of  $P_\beta$  for the sequences sampled from the candidate  
521 POMM. Some sequences that the model generates may be not observed not because the model  
522 overgeneralizes, but because there is not enough number of observations. This finite  $N$  effect  
523 can be estimated by sampling sets of  $N$  sequences from the model and computing  $P_\beta$ . This  
524 distribution is used to calculate the  $p$ -value of the  $P_\beta$  of the observed set computed with the  
525 POMM. We used the criteria  $p < 0.05$  for rejecting the POMM. Lowering this cut off value so  
526 that rejection is more stringent should enable acceptance of POMMs with fewer number of extra  
527 states. Our approach for deriving POMM from observed sequences is computationally intensive.  
528 The major cost is the sampling step. It would be interesting to investigate better methods for  
529 estimating the state multiplicity. One possibility is to measure the predictive information in



530 the syllable sequences and infer the number of parameters needed for encoding the sequence  
531 complexity (Bialek et al., 2001).

532 POMMs were inferred in a previous study by fitting probabilities distributions such as N-  
533 gram distributions, which are the probabilities of subsequences of length  $N$  (Jin and Kozhevnikov,  
534 2011). The method involved multiple heuristic steps, and was not easy to implement. Addi-  
535 tionally, the method required a large  $N$  because it relied on accurate measurements of the  
536 probabilities. In contrast, our method is principled, and can work with smaller  $N$ . Even though  
537 our method does not directly fit N-grams, the statistics of 2- to 7-grams agree between the  
538 observed sequences and the sequences generated by the POMMs (Fig. S7 and Fig. S8).

539 In conclusion, we devised a method of inferring minimal POMMs from observed sequences.  
540 Application of the method to the syllable sequences of Bengalese finch songs before and after  
541 deafening suggests that the auditory system helps to create context-dependences in syllable  
542 transitions. Our method should be broadly applicable to other animal behavioral sequences.

## 543 **Materials and Methods**

### 544 **Data set**

545 The data set in this work was previously used for analyzing syllable repeats (Wittenbach et al.,  
546 2015) (available for download from <http://personal.psu.edu/dzj2/SharedData/KrisBouchard/>).  
547 Details of recording songs, annotating syllables, and deafening through bilateral cochlear re-  
548 moval, as well as the Ethics Statement can be found in the published paper (Wittenbach et al.,  
549 2015). We specifically used the data collected from six male adult Bengalese finches before and  
550 after deafening (labeled bfa14, bfa16, bfa19, bfa7, o10bk90, and o46bk78).

551 In the data set, syllables are labelled  $a$  through  $l$ , and  $x$  through  $z$ . Some ambiguous syllables  
552 are noted with symbols  $0$  and  $-$ , and they are skipped. Bengalese finch song bouts typically  
553 begin with short introductory notes. They are labeled as  $i$ ,  $j$  and  $k$ . We define song sequences  
554 as segments of syllables that are bracketed by periods of introductory notes and the end of the

555 recordings.

## 556 POMM

557 A POMM is specified by a state vector  $V = [S, E, s_3, s_4, \dots, s_n]$ , where  $s_1 = S$  and  $s_2 = E$  are  
558 the start and the end states,  $n$  is the total number of states, and  $s_i$  for  $i = 3, \dots, n$  is the syllable  
559 symbol associated with the  $i$ th state. The same syllable symbol can appear multiple times in  
560 the state vector. Transitions between the states are described by a transition matrix  $T$ , whose  
561 element  $T_{ij}$  gives the probability of transition from state  $i$  to state  $j$ . There are no transitions  
562 to the start state, i.e.  $T_{i1} = 0$ ; and there are no transitions from the end state, i.e.  $T_{2j} = 0$ .

563 Sequence generation from a POMM starts with the  $S$  state. At state  $i$ , the next state  $j$  is  
564 chosen with the probabilities  $T_{ij}$  among possible choices of state 2 to state  $n$ . Once chosen, the  
565 symbol  $s_j$  is added to the sequence. This process repeats until the  $E$  state is reached, at which  
566 point the sequence generation is complete.

567 A POMM is visualized with the software Graphviz (Ellson et al., 2001). To reduce clutter,  
568 only transitions with probabilities larger than 0.01 are shown. Additionally, the  $E$  state is not  
569 shown. Instead, the states that can transition to the  $E$  state are shown in cyan. The transition  
570 probability from one state to the  $E$  state is 1 minus the sum of the transition probabilities to  
571 other states. If a state does not transition to the  $E$  state with a probability larger than 0.01,  
572 the state is shown as white. The start state is shown in pink.

## 573 Markov model

A Markov model is a special case of POMM for which each syllable symbol appears only once  
in the state vector. The transition probabilities  $T$  can be computed as

$$T_{ij} = \frac{N_{ij}}{N_i},$$

where  $N_i$  is the total number of times  $s_i$  appears in the set  $Y$  of sequences, and  $N_{ij}$  is the total number of the times that the two-symbol subsequence  $s_i s_j$  appears in  $Y$ . Note that

$$N_i = \sum_{j=1}^n N_{ij},$$

574 so we only need to compute  $N_{ij}$ .

### 575 **Baum-Welch algorithm**

Computing  $T$  for POMM with state multiplicity is more complicated than that for the Markov model, but the approach is similar. Starting from a set of random transition probabilities, the state transition sequences that correspond to the syllable sequences in  $Y$  are worked out. The transition probabilities are then updated according to

$$T_{ij} = \frac{N_{ij}}{N_i},$$

576 where  $N_i$  is number of times the state  $i$  appears in the state sequences, and  $N_{ij}$  is the number  
577 of times the subsequence of states  $ij$  appears. With the updated  $T$ , the process is repeated.  
578 The process stops when the changes in  $T$  is smaller than  $10^{-6}$ . Because the result might be  
579 dependent on the initialization of  $T$ , the process is run for 100 times with different seeds for  
580 random number generator. The  $T$  that maximizes the probabilities of generating  $Y$  from the  
581 POMM is selected.

The computation is efficiently implemented with the Baum-Welch algorithm (Rabiner, 1989). Consider a sequence  $y_1 y_2 \cdots y_t \cdots y_m$  in the set  $Y$ . Here  $t$  is the step in the sequence and  $m$  is the maximum length of the sequence. The algorithm consists of three parts. First, calculate the forward probability  $\alpha_i(t)$ , which is the probability of being at state  $i$  at step  $t$  given the proceeding sequence is  $y_1 y_2 \cdots y_{t-1}$ . This is computed iteratively with

$$\alpha_i(t+1) = \delta_i(y_{t+1}) \sum_{j=1}^n \alpha_j(t) T_{ji}.$$

Since all sequences start from the  $S$  state, the initial condition is  $\alpha_1(0) = 1$  and  $\alpha_j(0) = 0$  for all  $j \neq 1$ . Here  $\delta_i(y_{t+1}) = 1$  if the symbol  $y_{t+1}$  at step  $t + 1$  is the same as the symbol  $s_i$  associated with state  $i$ ; otherwise,  $\delta_i(y_{t+1}) = 0$ . Second, calculate the backward probability  $\beta_i(t)$ , which is the probability being at state  $i$  at step  $t$  and the follow-up sequence is  $y_{t+1}, \dots, y_m$ . This is calculated iteratively with

$$\beta_i(t) = \delta_i(y_t) \sum_{j=1}^n T_{ij} \beta_j(t+1).$$

Since all sequences end at the end state, the initial condition is  $\beta_2(m+1) = 1$  and  $\beta_j(m+1) = 0$  for all  $j \neq 2$ . Third, calculate  $N_i$  and  $N_{ij}$ . The forward and backward probabilities  $\alpha_i(t)$  and  $\beta_i(t)$  should be computed for each sequence in  $Y$ . The number of transition from state  $i$  to state  $j$  is given by

$$N_{ij} = \sum_Y \sum_{t=1}^m \alpha_i(t) T_{ij} \beta_j(t+1).$$

For a given sequence  $y_1 y_2 \dots y_m$ , the probability that the POMM generates it is given by

$$P_y = \alpha_2(m+1),$$

582 which is the forward probability of ending at the end state at step  $m + 1$ .

The total probability of the set  $Y$  is given by

$$P_Y = \prod_{y \in Y} P_y.$$

It is most convenient to use the log likelihood, which is

$$L_Y = \log P_Y = \sum_{y \in Y} \log P_y.$$

583 **Sequence completeness, total variation distance and augmented sequence com-**  
584 **pleteness**

For a set of sequences  $Y$ , the sequence completeness on a POMM is computed as

$$P_c = \sum_{y \in Y} P_y,$$

585 where  $y$  is a unique sequence in  $Y$ . The sum is over all the unique sequences in the set.

For a set of observed sequences  $Y_o$ , the total variation distance is defined as

$$d = \frac{1}{2} \sum_{y \in Y_o} |P_y - P_{y,m}|.$$

Here  $P_{y,m}$  is the probability of the unique sequence  $y$  computed on the POMM and then *normalized* among the unique sequences such that

$$\sum_{y \in Y_o} P_{y,m} = 1.$$

This normalization is necessary because  $P_{y,m}$  is compared to  $P_y$ , which is normalized:

$$\sum_{y \in Y_o} P_y = 1.$$

586 The total variation distance ranges from 0 to 1.

The augmented sequence completeness is defined as

$$P_\beta = (1 - \beta)P_c + \beta(1 - d).$$

587 Here  $\beta$  is a parameter that can be chosen in the range  $(0, 1)$ . The value of  $P_\beta$  ranges from 0 to  
588 1. A perfect POMM for the observed set should yield  $P_\beta = 1$  because  $P_c = 1$  and  $d = 0$ . When  
589  $N$  is small, the measurements of  $P_y$  are not accurate. For this case, the contribution from  $d$

590 should be reduced by taking a small value for  $\beta$ . In our work, we chose  $\beta = 0.2$ .

## 591 **Statistical test**

To test whether an observed set  $Y_o$  with  $N$  sequences could be generated from a POMM, we generate  $M = 10000$  sets of  $N$  sequences, and compute the  $P_\beta$  of the generated sets, which gives a distribution of  $P_\beta$ . We also compute the augmented sequence completeness  $P_{\beta,o}$  of the observed set. In the distribution, we count the number  $K$  of  $P_\beta$  that are smaller or equal to  $P_{\beta,o}$ . To avoid small fluctuations in  $P_\beta$  making  $K$  artificially small, we added  $10^{-10}$  to  $P_{\beta,o}$ . The p-value is

$$p = \frac{K}{M}.$$

592 The POMM is rejected if  $p < 0.05$ , and accepted otherwise.

## 593 **Inferring minimal POMM**

594 For a given set  $Y$  of  $N$  syllable sequences, the minimal POMM is inferred through three steps:  
595 grid search in the state space; state deletion; and removal of transitions. Let  $k$  be the number  
596 of syllables. The grid space has  $k$  dimensions, and the grid points  $(x_1, x_2, \dots, x_k)$  specifies a  
597 state vector  $V$  in which syllable  $s_i$  appears  $x_i$  times. Grid search starts with the Markov model  
598  $(1, 1, \dots, 1)$ . The model is tested for statistical significance of the  $P_\beta$  of  $Y$  on the model. If  
599 the Markov model is rejected, the nearby grid points  $(2, 1, \dots, 1), (1, 2, \dots, 1), \dots, (1, 1, \dots, 2)$   
600 are evaluated. The transition matrix  $T$  for each corresponding POMM is inferred using the  
601 Baum-Welch algorithm. The grid point with the maximum log-likelihood is selected, and the  
602 corresponding POMM is tested for the  $P_\beta$  significance. If rejected, the nearby points of the  
603 newly selected grid point are evaluated. This process continues, until one POMM is accepted  
604 according to the  $P_\beta$  statistical test.

605 Because grid search is a local “hill climbing” scheme, the POMM at which the search  
606 stops may not be the minimal POMM. We therefore perform state deletion, which is oppo-  
607 site of grid search. From the accepted POMM  $(x_1, x_2, \dots, x_k)$  in the grid search, we test grid

608 points with one less number of states for one of the syllables:  $(x_1 - 1, x_2, \dots, x_k), (x_1, x_2 -$   
609  $1, \dots, x_k), (x_1, x_2, \dots, x_k - 1)$ . The grid point with the maximum log-likelihood is selected, and  
610 the POMM is tested for the  $P_\beta$  statistics. If the POMM is accepted, the next round of state dele-  
611 tion is performed. This process repeats, until no POMM at the tested grid points is accepted.  
612 The last accepted POMM in the process is the minimal POMM.

The final step is minimization of the number of transitions in the POMM. We first remove all transitions with probability smaller than 0.001. We then remove the remaining transitions one by one, and re-compute the transition matrix  $T$  after each removal. To remove a transition from state  $i$  to state  $j$ , we set  $T_{ij} = 0$  in the initial transition matrix for the Baum-Welch algorithm. The algorithm ensures that this transition element remains 0. If the log-likelihood remains within the threshold, the removal is accepted and kept; otherwise the removal is rejected and reversed. The threshold is

$$L_\theta = L_{max} - \mu\sigma_L,$$

613 where  $L_{max}$  is the log-likelihood of the original POMM before any deletions, and  $\sigma_L$  is the  
614 standard deviation of the log-likelihood of the 100 runs of Baum-Welch algorithms with different  
615 random seeds. The parameter  $\mu$  is set to 1. If after the deletions the p-value of the  $P_\beta$  test goes  
616 below 0.05,  $\mu$  is reduced to 0.5, and the deletion process is done again. This reduction in  $\mu$  is  
617 rarely needed.

## 618 **Probability of finding a subsequence**

The probability  $P_s$  of finding a subsequence in a set  $Y$  is defined as

$$P_s = \frac{K}{N},$$

619 where  $N$  is the number of sequences in the set, and  $K$  is number of sequences that contains the  
620 subsequence.

## 621 State merging tests

622 To evaluate the context dependent syllable transitions encoded by state multiplicity in a POMM,  
623 we perform pairwise state merging tests. The merged state retains all transitions to and from  
624 the two states. The transition probabilities of the state-merged POMM are recomputed using  
625 the Baum-Welch algorithm and the observed set  $Y_o$ . By examining the states transitioning into  
626 the two states, and the states that follow the two states, we find possible subsequences that  
627 can show overgeneralization after the state merger. We find a subsequence that either is unseen  
628 in the observed set ( $P_{s,o} = 0$ ) or has small probability  $P_{s,o}$ . To see whether the subsequence  
629 is significantly more probable in the sequences generated from the state-merged POMM, we  
630 generate 10000 sets of  $N$  sequences from the POMM. Here  $N$  is the number of sequences in  $Y_o$ .  
631 For each generated set, we compute  $P_s$ . This creates a distribution. We count the number of  $P_s$   
632 that is smaller than or equal to  $P_{s,o} + 10^{-10}$ . The p-value is the ratio of this number and 10000.  
633 We add a small number  $10^{-10}$  to  $P_{s,o}$ . This is for avoiding artificially lowering p-value due to  
634 those  $P_s$  that are equal to  $P_{s,o}$ . For example, if the subsequence is unobserved ( $P_{s,o} = 0$ ) and  
635 the state-merged POMM does not generate it either, we would have a situation that  $P_s = 0$  for  
636 all of the sampled set. By adding the small number to  $P_{s,o}$ , we ensure that  $p = 1$ , as it should  
637 be. If  $p < 0.05$ , we conclude that the enhancement of  $P_s$  after state merger is significant.

## 638 Wilcoxon signed-rank test

639 For comparing distributions of paired data in Fig. ??, we use Wilcoxon signed-rank test using  
640 `scipy.stats.wilcoxon`, which is in the Python module `scipy`.

## References

Amador A, Perl YS, Mindlin GB, Margoliash D (2013) Elemental gesture dynamics are encoded by song premotor cortical neurons. *Nature* 495:59.



Bialek W, Nemenman I, Tishby N (2001) Predictability, complexity, and learning. *Neural computation* 13:2409–2463.

Chang W, Jin DZ (2009) Spike propagation in driven chain networks with dominant global inhibition. *Physical Review E* 79:051917.

Cohen Y, Shen J, Semu D, Leman DP, Liberti WA, Perkins LN, Liberti DC, Kotton DN, Gardner TJ (2020) Hidden neural states underlie canary song syntax. *Nature* 582:539–544.

Coleman MJ, Mooney R (2004) Synaptic transformations underlying highly selective auditory representations of learned birdsong. *Journal of Neuroscience* 24:7251–7265.

Doupe AJ, Kuhl PK (1999) Birdsong and human speech: common themes and mechanisms. *Annual review of neuroscience* 22:567–631.

Egger R, Tupikov Y, Elmaleh M, Katlowitz KA, Benezra SE, Picardo MA, Moll F, Kornfeld J, Jin DZ, Long MA (2020) Local axonal conduction shapes the spatiotemporal properties of neural sequences. *Cell* 183:537–548.

Ellson J, Gansner E, Koutsofios L, North SC, Woodhull G (2001) Graphviz – open source graph drawing tools In *International Symposium on Graph Drawing*, pp. 483–484. Springer.

Fee MS, Kozhevnikov AA, Hahnloser RH (2004) Neural mechanisms of vocal sequence generation in the songbird. *Annals of the New York Academy of Sciences* 1016:153–170.

Gibbs AL, Su FE (2002) On choosing and bounding probability metrics. *International statistical review* 70:419–435.

Hahnloser RH, Fee MS (2007) Sleep-related spike bursts in hvc are driven by the nucleus interface of the nidopallium. *Journal of neurophysiology* 97:423–435.

Hahnloser RH, Kozhevnikov AA, Fee MS (2002) An ultra-sparse code underlies the generation of neural sequences in a songbird. *Nature* 419:65.

Hamaguchi K, Tanaka M, Mooney R (2016) A distributed recurrent network contributes to temporally precise vocalizations. *Neuron* 91:680–693.

Hanuschkin A, Diesmann M, Morrison A (2011) A reafferent and feed-forward model of song syntax generation in the bengalese finch. *Journal of computational neuroscience* 31:509–532.

Hosino T, Okanoya K (2000) Lesion of a higher-order song nucleus disrupts phrase level complexity in bengalese finches. *Neuroreport* 11:2091–2095.

Isola GR, Vochin A, Sakata JT (2020) Manipulations of inhibition in cortical circuitry differentially affect spectral and temporal features of bengalese finch song. *Journal of Neurophysiology* 123:815–830.

Jin DZ (2009) Generating variable birdsong syllable sequences with branching chain networks in avian premotor nucleus hvc. *Physical Review E* 80:051902.

Jin DZ (2013) The neural basis of birdsong syntax. *Progress in cognitive science: From cellular mechanisms to computational theories* .

Jin DZ, Kozhevnikov AA (2011) A compact statistical model of the song syntax in bengalese finch. *PLoS computational biology* 7:e1001108.

Jin DZ, Ramazanoğlu FM, Seung HS (2007) Intrinsic bursting enhances the robustness of a neural network model of sequence generation by avian brain area hvc. *Journal of computational neuroscience* 23:283–299.

Jun JK, Jin DZ (2007) Development of neural circuitry for precise temporal sequences through spontaneous activity, axon remodeling, and synaptic plasticity. *PLoS One* 2:e723.

Long MA, Jin DZ, Fee MS (2010) Support for a synaptic chain model of neuronal sequence generation. *Nature* 468:394.

Lynch GF, Okubo TS, Hanuschkin A, Hahnloser RH, Fee MS (2016) Rhythmic continuous-time coding in the songbird analog of vocal motor cortex. *Neuron* 90:877–892.

Markowitz JE, Ivie E, Kligler L, Gardner TJ (2013) Long-range order in canary song. *PLoS computational biology* 9:e1003052.

Okanoya K (2004) The bengalese finch: a window on the behavioral neurobiology of birdsong syntax. *Annals of the New York Academy of Sciences* 1016:724–735.

Okanoya K, Yamaguchi A (1997) Adult bengalese finches (*lonchura striata* var. *domestica*) require real-time auditory feedback to produce normal song syntax. *Journal of neurobiology* 33:343–356.

Picardo MA, Merel J, Katlowitz KA, Vallentin D, Okobi DE, Benezra SE, Clary RC, Pnevmatikakis EA, Paninski L, Long MA (2016) Population-level representation of a temporal sequence underlying song production in the zebra finch. *Neuron* 90:866–876.

Rabiner LR (1989) A tutorial on hidden markov models and selected applications in speech recognition. *Proceedings of the IEEE* 77:257–286.

Resnik J, Polley DB (2021) Cochlear neural degeneration disrupts hearing in background noise by increasing auditory cortex internal noise. *Neuron* 109:984–996.

Sakata JT, Brainard MS (2006) Real-time contributions of auditory feedback to avian vocal motor control. *Journal of Neuroscience* 26:9619–9628.

Sakata JT, Brainard MS (2008) Online contributions of auditory feedback to neural activity in avian song control circuitry. *Journal of Neuroscience* 28:11378–11390.

Troyer TW, Brainard MS, Bouchard KE (2017) Timing during transitions in bengalese finch song: implications for motor sequencing. *Journal of neurophysiology* 118:1556–1566.

Tupikov Y, Jin DZ (2021) Addition of new neurons and the emergence of a local neural circuit for precise timing. *PLoS computational biology* 17:e1008824.

Wittenbach JD, Bouchard KE, Brainard MS, Jin DZ (2015) An adapting auditory-motor feedback loop can contribute to generating vocal repetition. *PLoS computational biology* 11:e1004471.

Woolley SM, Rubel EW (1997) Bengalese finches *lonchura striata domestica* depend upon auditory feedback for the maintenance of adult song. *Journal of Neuroscience* 17:6380–6390.

Woolley SM, Rubel EW (2002) Vocal memory and learning in adult bengalese finches with regenerated hair cells. *Journal of Neuroscience* 22:7774–7787.

Zhang YS, Wittenbach JD, Jin DZ, Kozhevnikov AA (2017) Temperature manipulation in songbird brain implicates the premotor nucleus hvc in birdsong syntax. *Journal of Neuroscience* 37:2600–2611.

## Figure Legends

641 **Figure 1: Two types of context dependent syllable transitions.** Two examples are used  
642 to illustrate the computations of sequence completeness  $P_c$ , the total variation distance  $d$ , and  
643 the augmented sequence completeness  $P_\beta$ . Example 1 shows type I context dependence, and  
644 Example 2 shows type II context dependence.

646 **Figure 2: Neural mechanisms of POMM.** Schematics of how chain networks in HVC can  
647 be wired to implement the state multiplicity in POMMs. **a.** In the intrinsic mechanism, the  
648 multiple states for a syllable ( $C$  in this example) correspond to multiple syllable-chains that  
649 drive the production of the same syllable. **b.** In the re-afferent mechanism, the multiple states  
650 are due to auditory feedback biasing transition probabilities at the branching points.

652 **Figure 3: Statistical test of a POMM.** **a.** The ground truth POMM for generating the  
653 “observed set” of sequences from which the Markov models are derived. The POMM has two  
654 states for syllables  $A$  and  $C$ , and one states for syllables  $B$ ,  $D$ , and  $E$ . The two states for  $A$   
655 encodes type I context dependence, and the two states for  $C$  encodes type II context dependence.  
656 The sequences generated from the POMM are shown for  $N = 10, 30, 60$ . **b.** Markov models  
657 derived from the observed sets (up) and the distributions of  $P_\beta$  of 10000 sets of  $N$  sequences  
658 generated from the Markov models. The redlines indicate the  $P_\beta$  of the generated sequences  
659 computed with the Markov model. Three cases for  $N = 10, 30, 60$  are shown.

661 **Figure 4: Derived POMMs for the example.** POMMs are derived from 100 sets of  $N =$   
662  $10, 30, 90$  generated from the ground truth model shown in Fig. 3a. Typical structures of the  
663 POMMs (top) and distributions of the number of states for the syllables (bottom) are shown.

665 **Figure 5: Test of Markov model for bird o10bk90.** The Markov models (top) and the  
666  $P_\beta$  distributions (bottom) are shown for the normal hearing condition (left) and after deafening  
667 (right). The red lines are  $P_\beta$  of the observed sets computed with the Markov models. For both  
668 before and after deafening, the Markov models are rejected ( $p = 0$  in both cases).

670 **Figure 6: POMM for bird o10bk90.** The POMMs before (left) and after (right) deafening are  
671 shown. The syllables with multiple states are highlighted with red. The p-values, the number  
672  $N$  of sequences in the observed sets, and the  $P_\beta$  are displayed. Before deafening, syllables  $f$  and  
673  $g$  each have two states. After deafening,  $f$  still has two states but  $g$  has one state.

675 **Figure 7: POMM for bird bfa7 .** Same as in Fig. 6. Before deafening, syllable  $b$  has 2 states,  
676 and syllables  $c$  and  $d$  each has 4 states. After deafening, there is no state multiplicity. Note that  
677 syllable  $g$  is dropped after deafening.

679 **Figure 8: POMM for bird bfa16.** Same as in Fig. 6. Before deafening, syllables  $a$ ,  $d$  and  $e$   
680 each has 2 states. After deafening, only syllable  $e$  retains 2 states.

682 **Figure 9: POMM for bird bfa19.** Same as in Fig. 6. Before deafening, syllables  $b$ ,  $c$ ,  $e$  and  
683  $f$  each has 2 states. After deafening, the state multiplicity disappears. Many novel transitions  
684 appear after deafening for this bird.

686 **Figure 10: POMM for bird bfa14.** Same as in Fig. 6. Before deafening, syllables  $c$  and  $g$  each  
687 has 2 states. After deafening, the state multiplicity disappears. Many novel transitions appear  
688 after deafening for this bird.

690 **Figure 11: POMM for bird o46bk78.** Same as in Fig. 6. Before deafening, all but one syllable  
691  $f$  has multiple states ( $a$ , 3;  $b$ , 4;  $c$ , 3;  $d$ , 2; and  $e$  2). After deafening the many-to-one disappears  
692 for all but syllable  $b$ , which still has 2 states.

694 **Figure 12: Summary of the effects of deafening on POMM.** (Left ) The total numbers of  
695 extra states in POMMs decrease for all birds. (Right) The mean normalized transition entropies  
696 at branching points in the POMMs increase for all but one bird (bfa16), indicating that the  
698 transitions at branching points tend to become equally probable after deafening.

699 **Figure S1: (Supplementary) Statistical test of Markov model.** **a.** The ground truth  
700 model is a Markov model. Contrast this with the model in Fig. 3a. **b.** Examples of sequences  
701 generated from the ground truth model. **c.** From the “observed” sets of  $N$  sequences generated  
702 with the ground truth model ( $N = 10, 30, 60$ ), Markov models are derived. The Markov models  
703 are tested with the distribution of  $P_\beta$ . The red lines indicate the  $P_\beta$  of the generated sequences  
705 from the Markov models. As expected, for all  $N$  the Markov model is not rejected.

706 **Figure S2: (Supplementary) Test of Markov model for bird bfa7.** Same as in Fig. 5.  
707 Before deafening, the Markov model is rejected ( $p = 0$ ). After deafening, the Markov model is  
709 not rejected ( $p = 0.42$ ).

710 **Figure S3: (Supplementary) Test of Markov model for bird bfa16.** Same as in Fig. 5.  
712 Both before and after deafening, the Markov models are rejected ( $p = 0$  in both cases).

713 **Figure S4: (Supplementary) Test of Markov model for bird bfa19.** Same as in Fig. 5.  
714 Before deafening, the Markov model is rejected ( $p = 0.02$ ). After deafening, the Markov model  
716 is not rejected ( $p = 0.34$ ).

717 **Figure S5: (Supplementary) Test of Markov model for bird bfa14.** Same as in Fig. 5.  
718 Before deafening, the Markov model is rejected ( $p = 0$ ). After deafening, the Markov model is  
720 not rejected ( $p = 0.56$ ).

721 **Figure S6: (Supplementary) Test of Markov model for bird o46bk78.** Same as in Fig. 5.  
723 Both before and after deafening, the Markov models are rejected ( $p = 0$  in both cases).

724 **Figure S7: (Supplementary) Comparisons of N-gram distributions in normal hearing**  
725 **condition.** For each bird, the probability distributions of 2- to 7 -grams of the sequences in the  
726 observed set are plotted in red. The N-grams are sorted in the decreasing orders of probabilities  
727 in the red curves. For comparisons, the probabilities of the same N-grams are computed for 100  
728 sets of sequences generated from the POMM. Each set contains the same number of sequences  
729 as in the observed set. The N-gram probabilities are plotted with gray lines. For all birds, the  
730 red lines overlap with the gray lines, suggesting that the N-gram distributions agree between  
732 the observed sets and the generated sets.

733 **Figure S8: (Supplementary) Comparisons of N-gram distributions after deafening.**  
735 The same as in Fig. S7 but for the deafened cases.



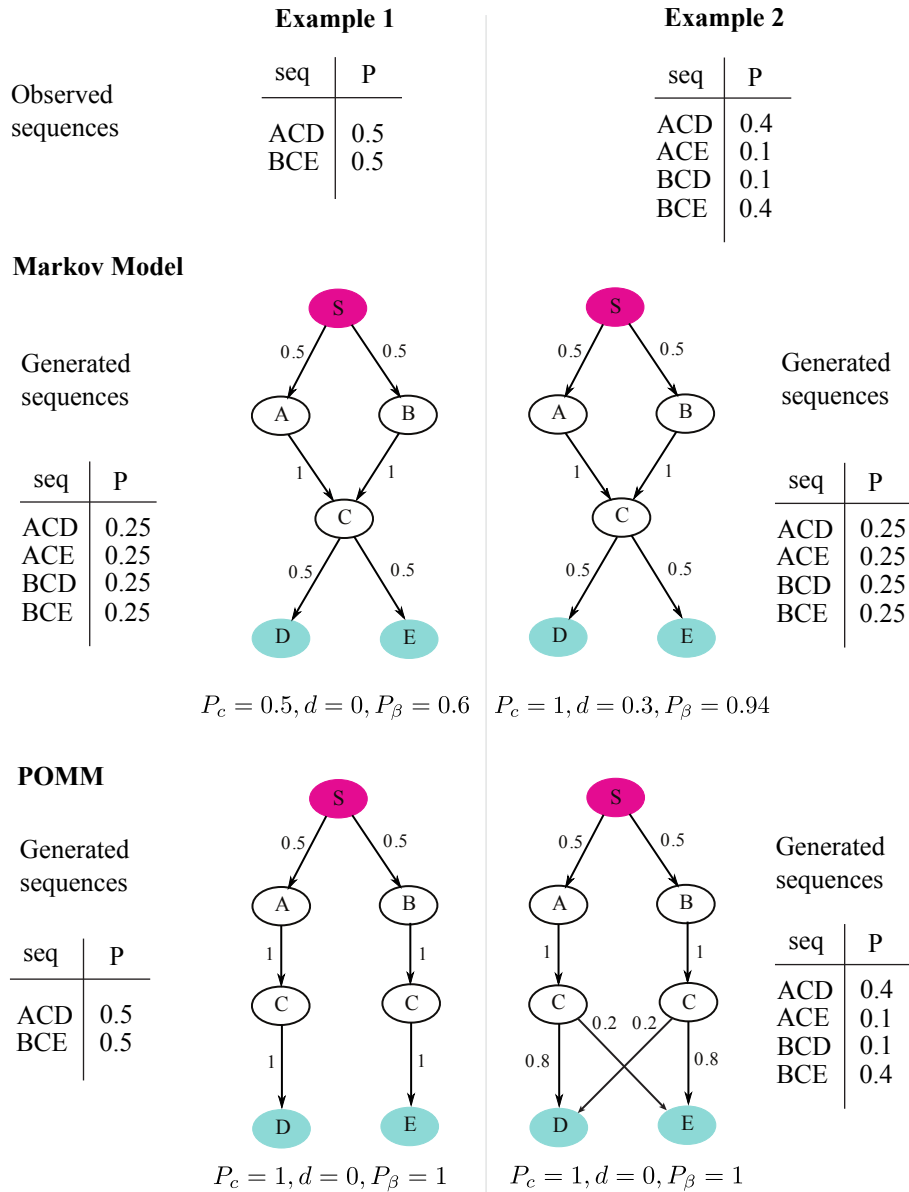

736

738

**Fig. 1** Two types of context dependent syllable transitions.

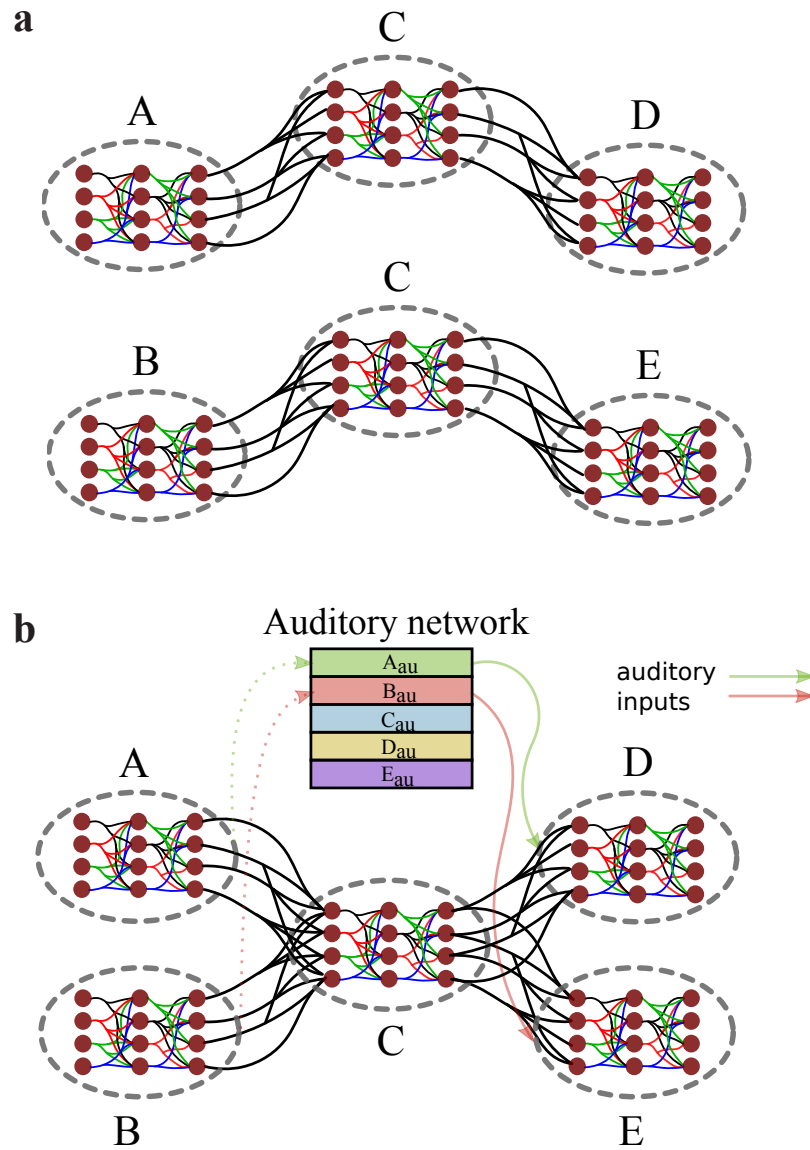

739

740

Fig. 2 Neural mechanisms of POMM.

a

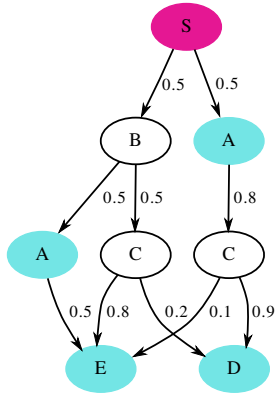

| N=10 | N=30 |     |     | N=60 |     |     |     |     |     |
|------|------|-----|-----|------|-----|-----|-----|-----|-----|
| ACD  | ACD  | ACD | BA  | BCE  | ACD | ACD | BCD | ACE | BCE |
| A    | ACE  | BAE | BA  | A    | BCE | ACD | ACD | ACD | BA  |
| ACD  | BA   | ACD | ACD | A    | ACD | BCE | A   | BAE | BCE |
| BA   | BCE  | BA  | ACD | BCE  | BCE | ACE | ACD | BCE | BA  |
| BCE  | BAE  | BCE | ACD | BCE  | ACD | BCD | ACD | BCD | ACD |
| A    | ACD  | BCE | BCD | ACD  | BA  | BA  | BCE | ACD | ACD |
| ACD  | BCE  | A   | BAE | BCE  | ACD | ACD | BCE | BA  | ACD |
| BCE  | ACD  | A   | BAE | ACE  | ACD | ACE | BA  | ACD | ACD |
| BAE  | BCE  | BCE | ACD | BA   | ACD | BCE | ACD | BA  | ACD |
| ACD  | ACD  | BCE | ACD | A    | BCE | BCE | A   | BAE | BAE |

b

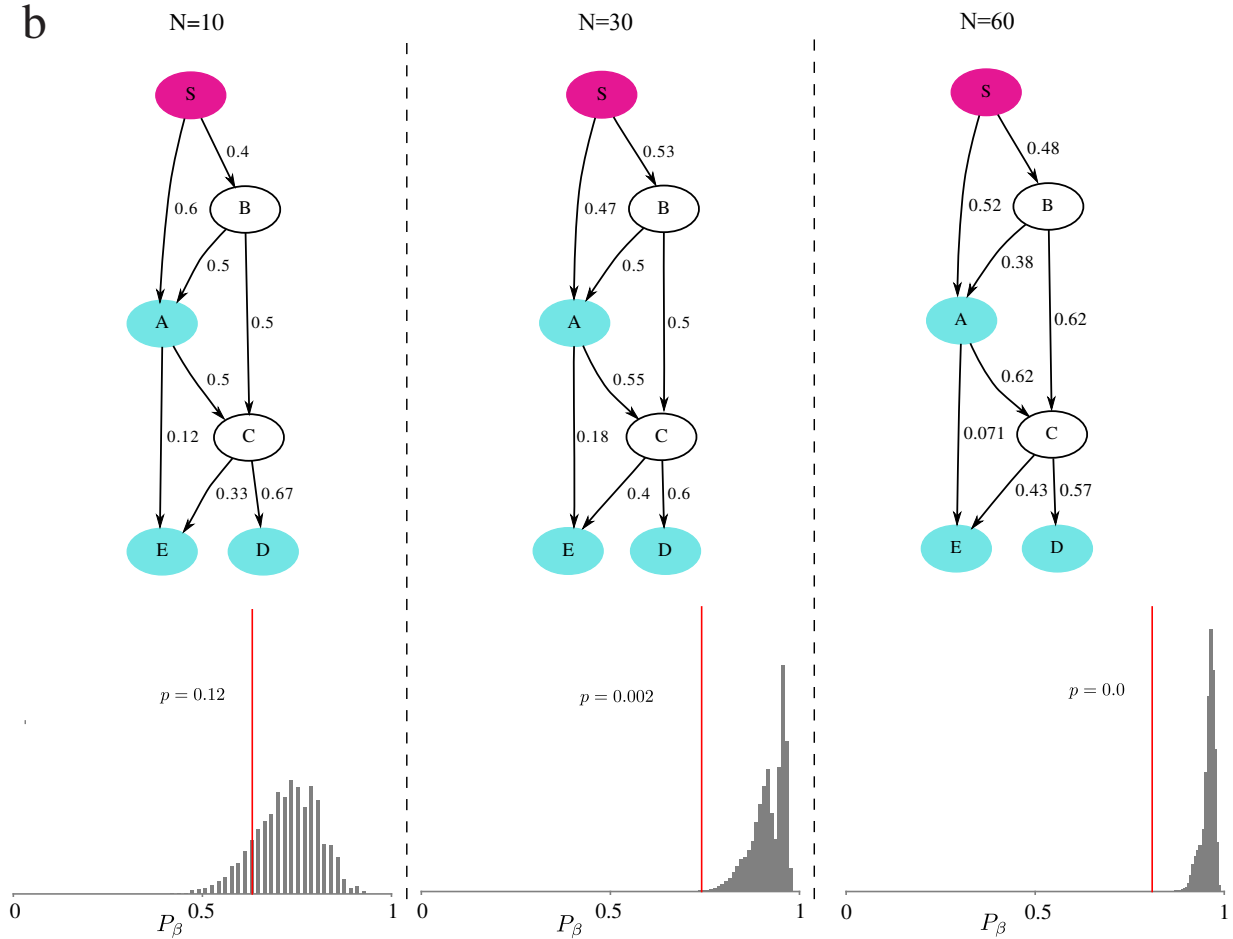

742

743

748

Fig. 3 Statistical test of a POMM.

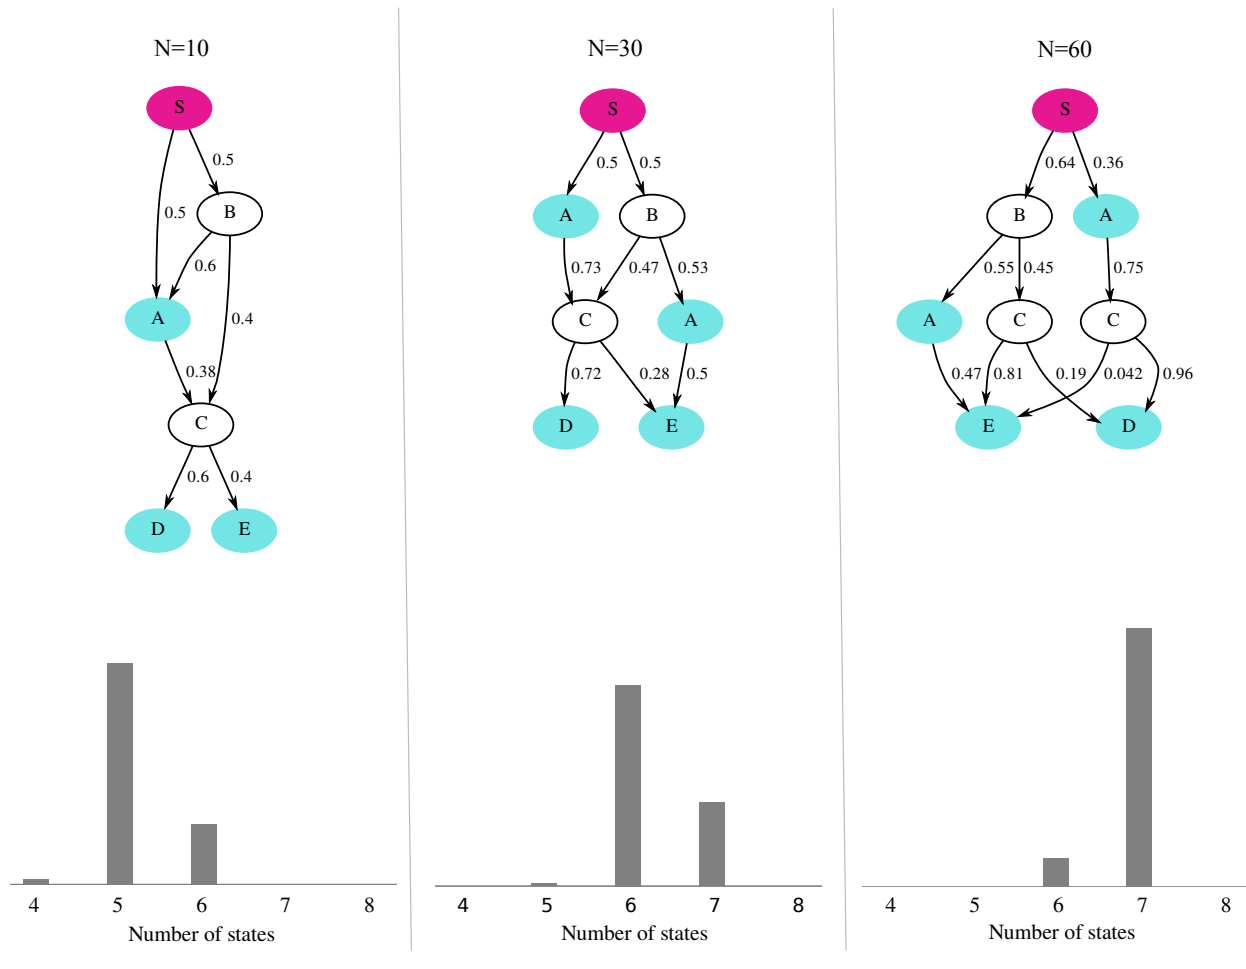

746  
747

749

Fig. 4 Derived POMM for the example.

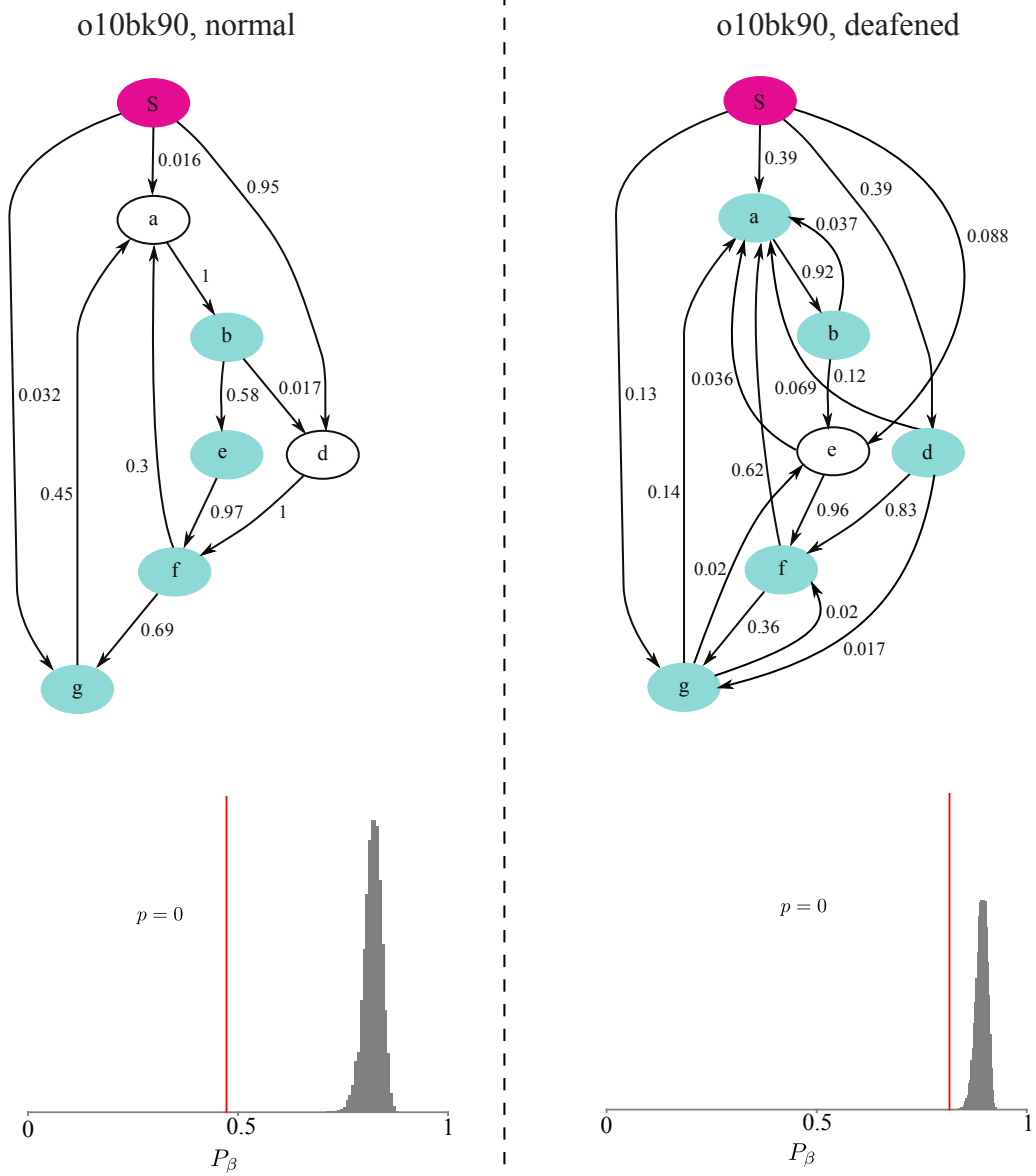

750

752

**Fig. 5 Test of Markov model for bird o10bk90.**

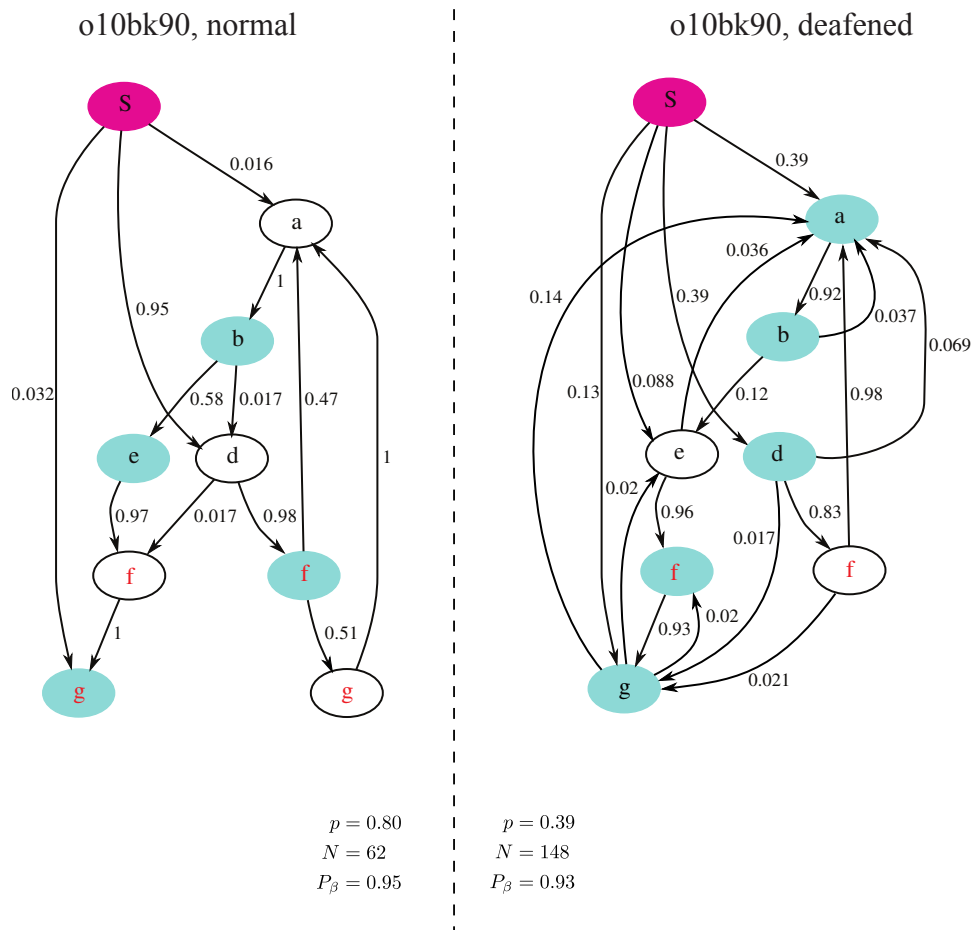

753

754

**Fig. 6 POMM for bird o10bk90.**

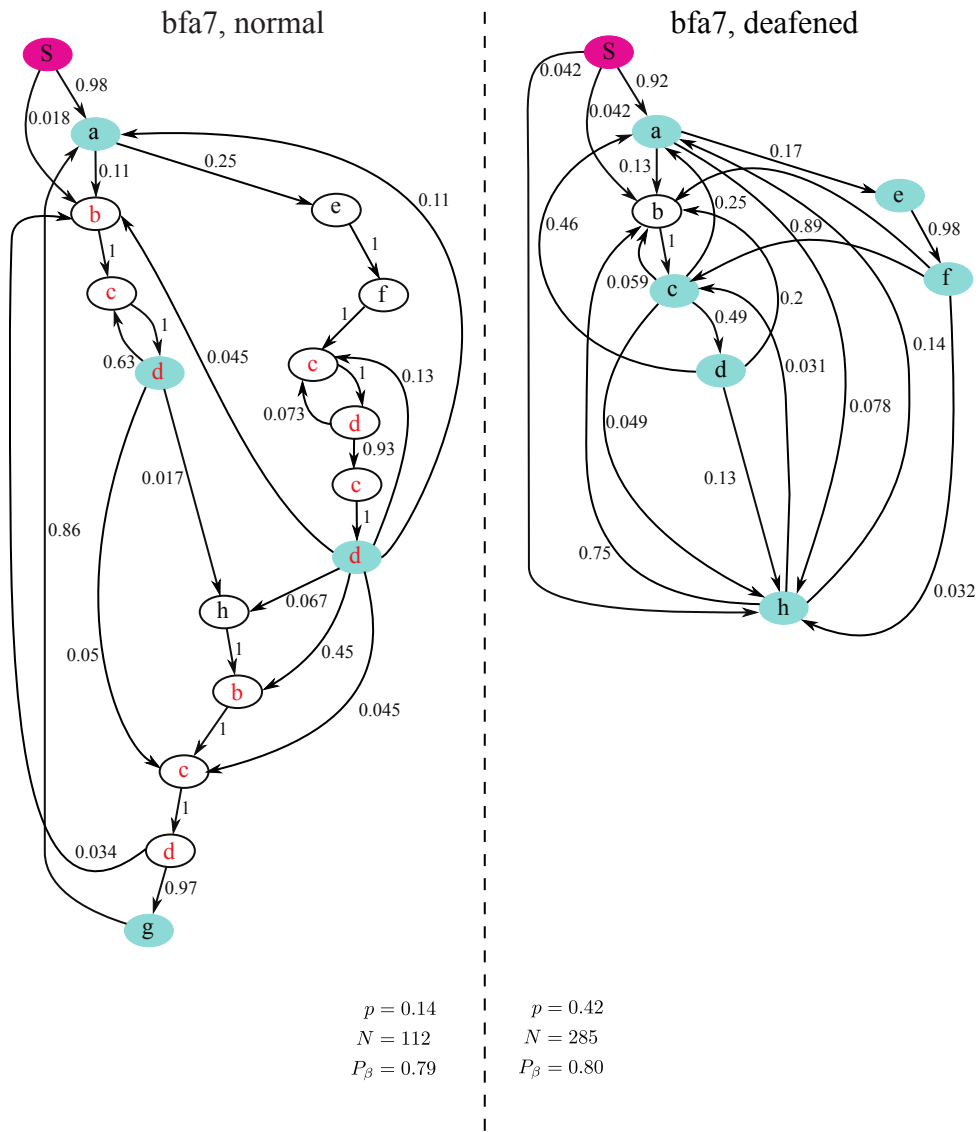

756

758

**Fig. 7 POMM for bird bfa7 .**

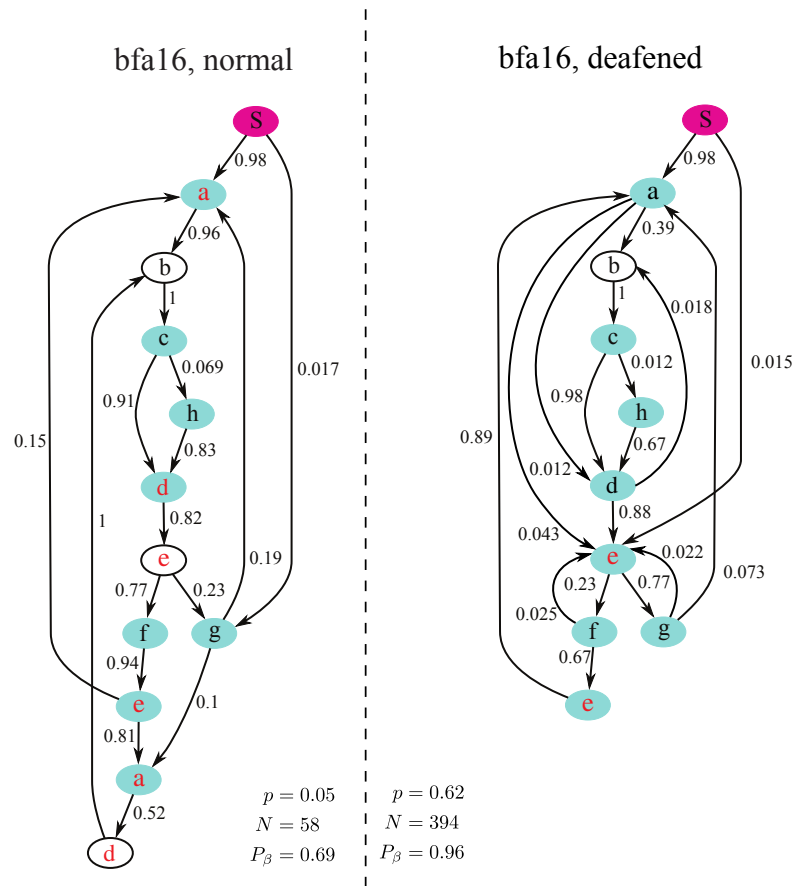

759

760

**Fig. 8 POMM for bird bfa16.**



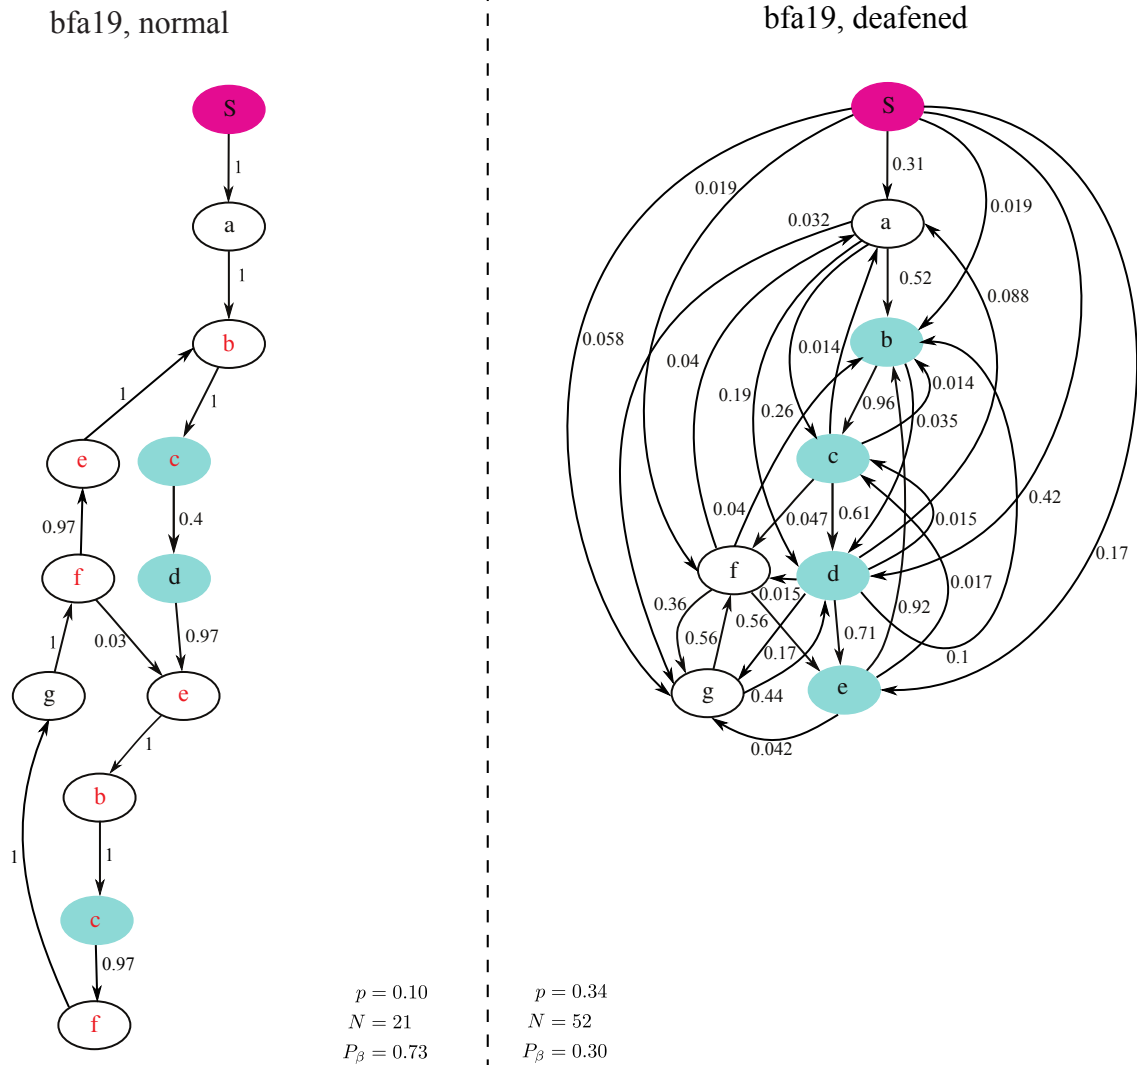

762

763

768

**Fig. 9 POMM for bird bfa19.**

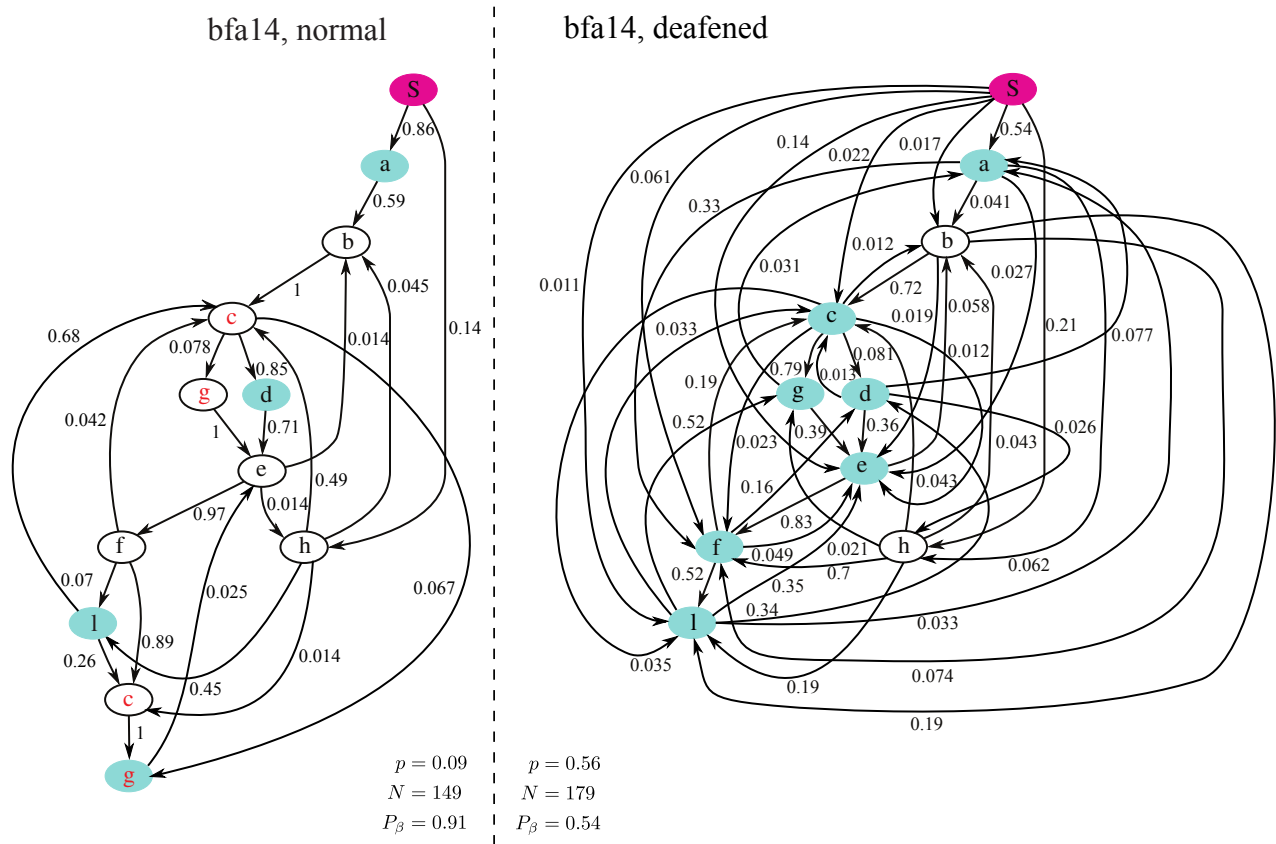

766

767

768

Fig. 10 POMM for bird bfa14.

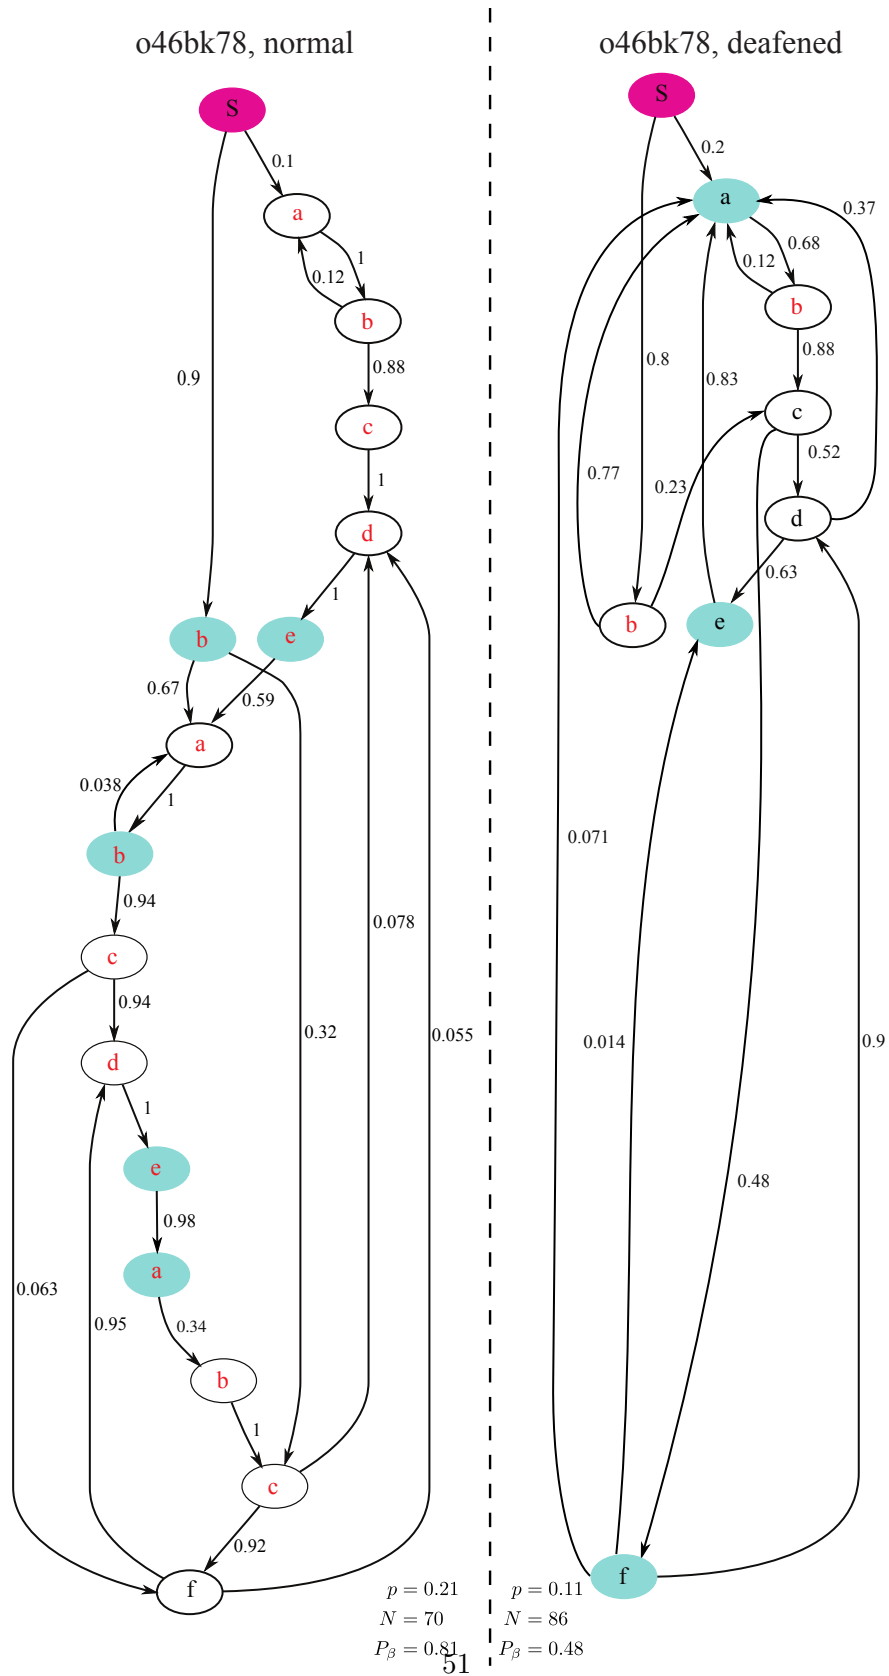

770

772

Fig. 11 POMM for bird o46bk78.

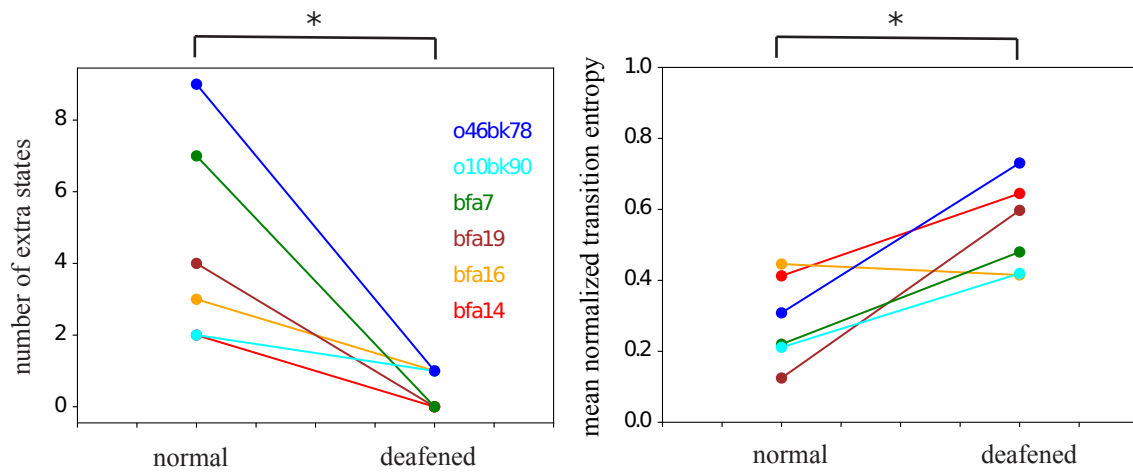

773

775

**Fig. 12** Summary of the effects of deafening on POMM.

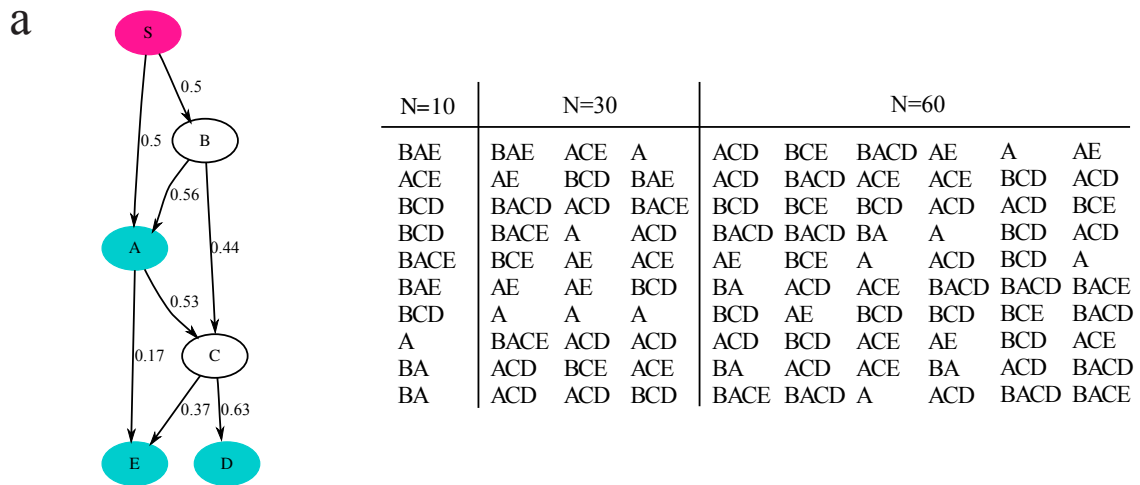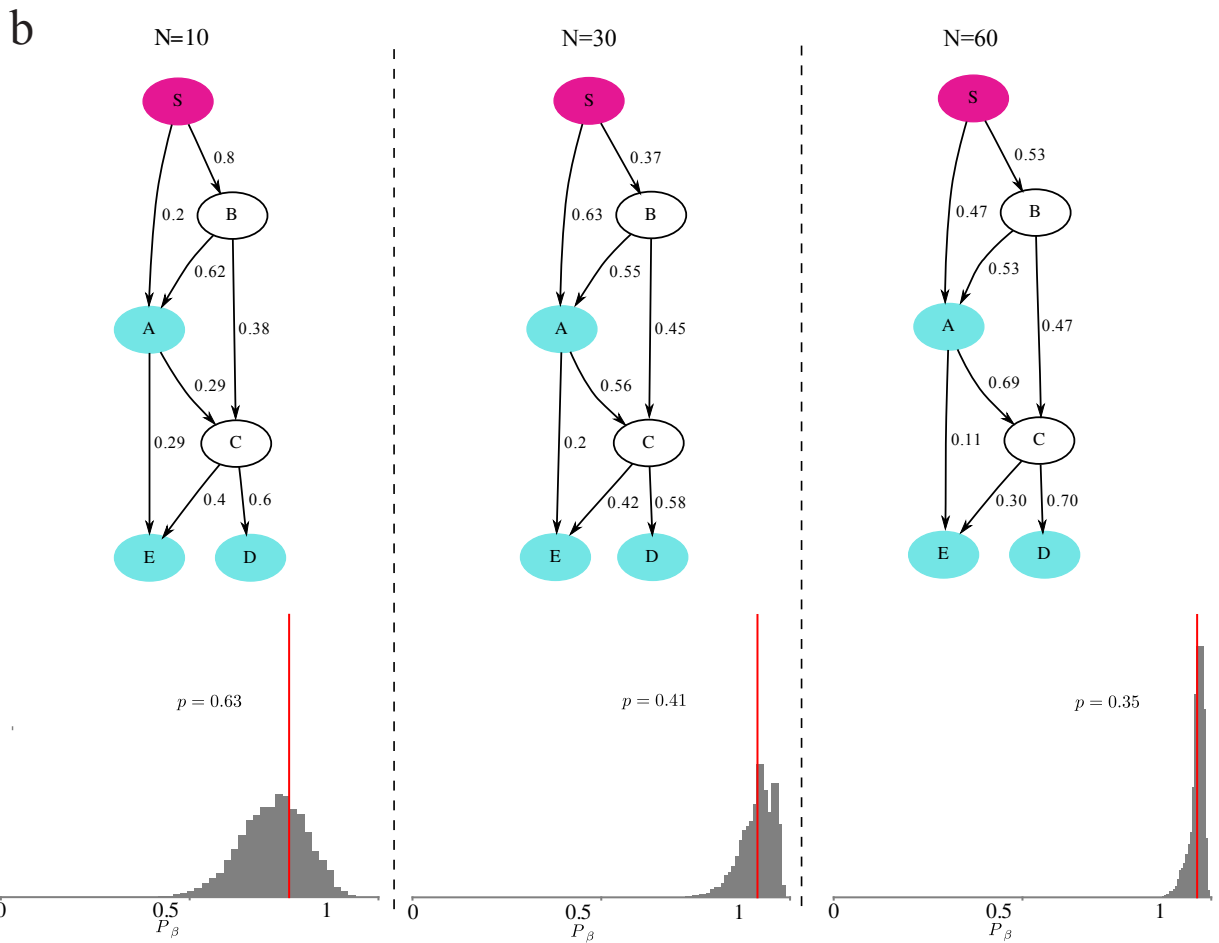

**Fig. S1 (Supplementary) Statistical test of Markov model.**

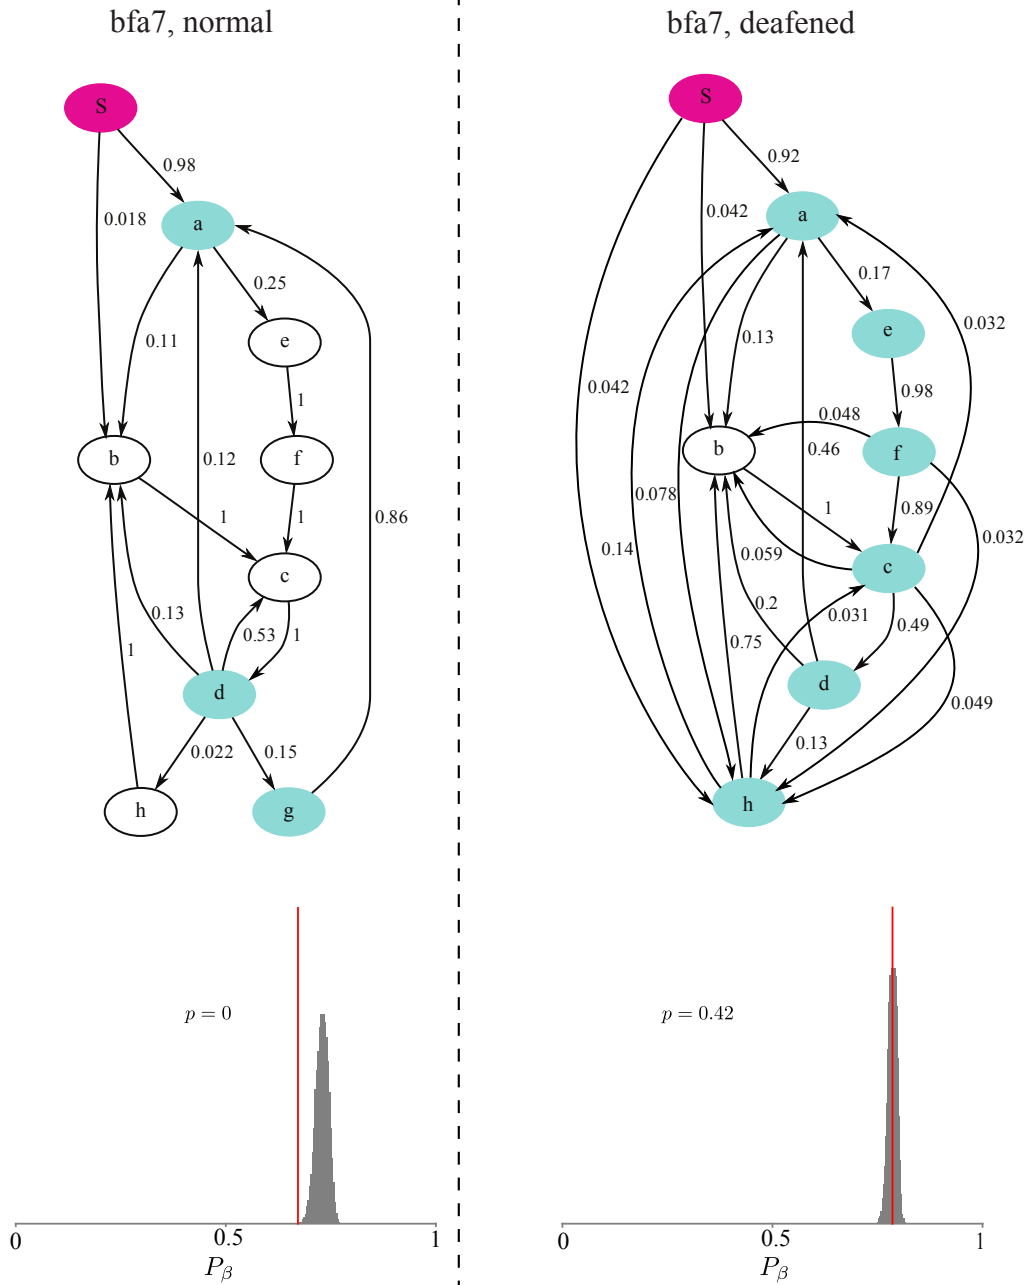

780

782

**Fig. S2 (Supplementary) Test of Markov model for bird bfa7 .**

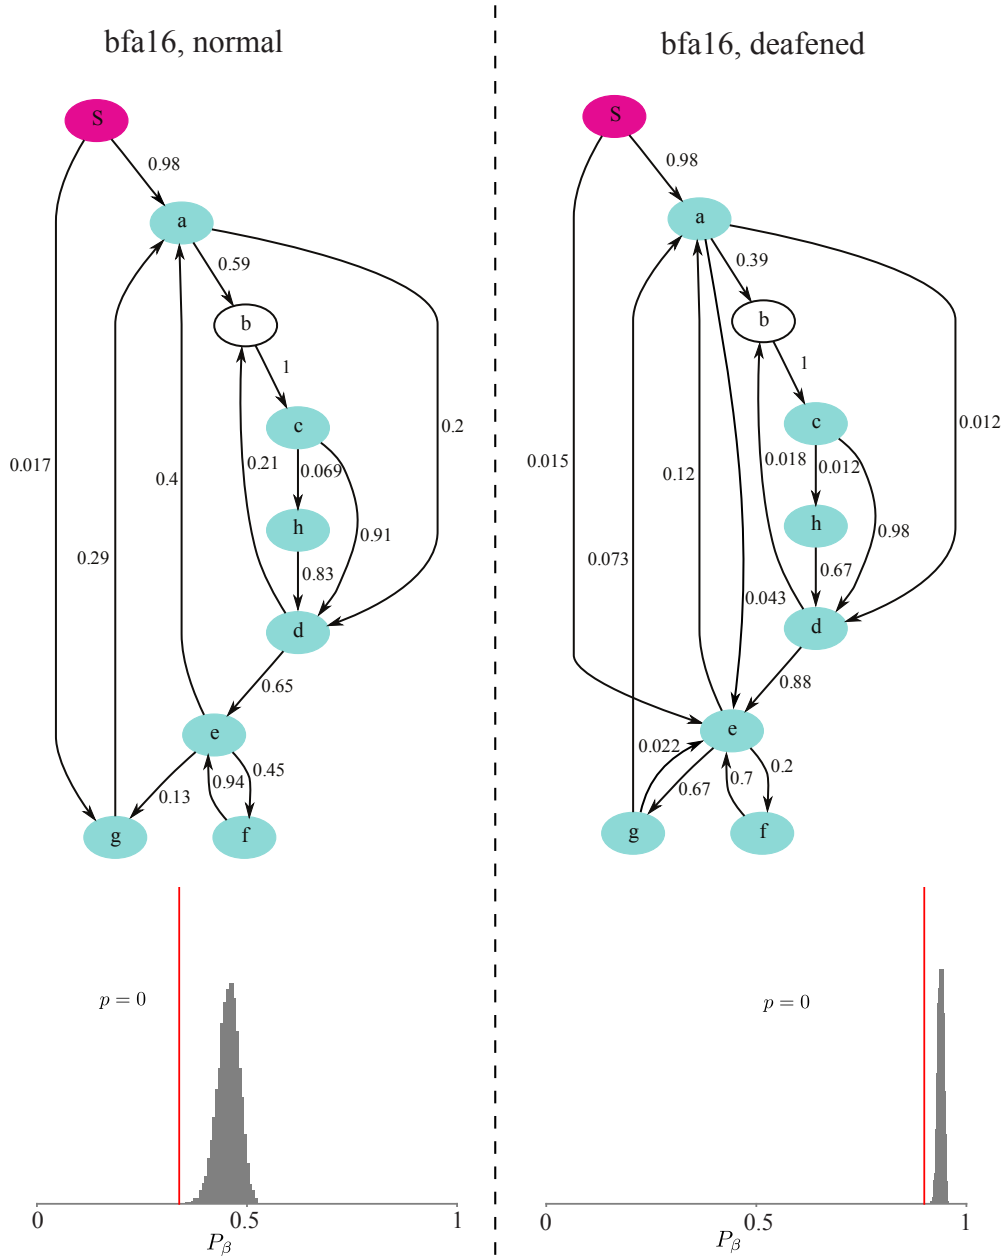

783

785

Fig. S3 (Supplementary) Test of Markov model for bird bfa16.

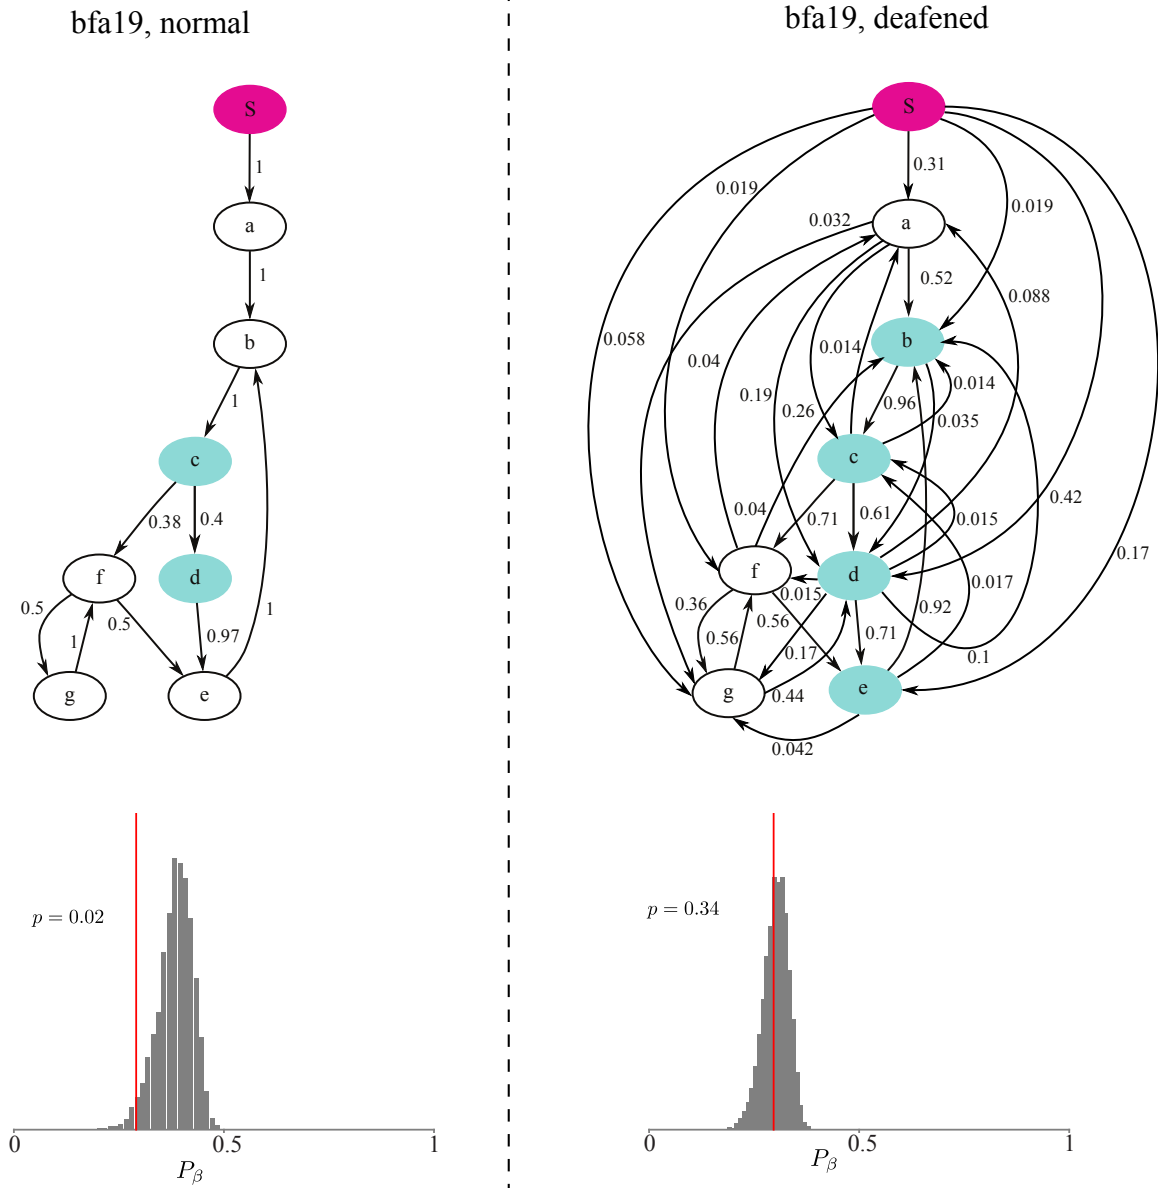

786

787

788

**Fig. S4 (Supplementary) Test of Markov model for bird bfa19.**



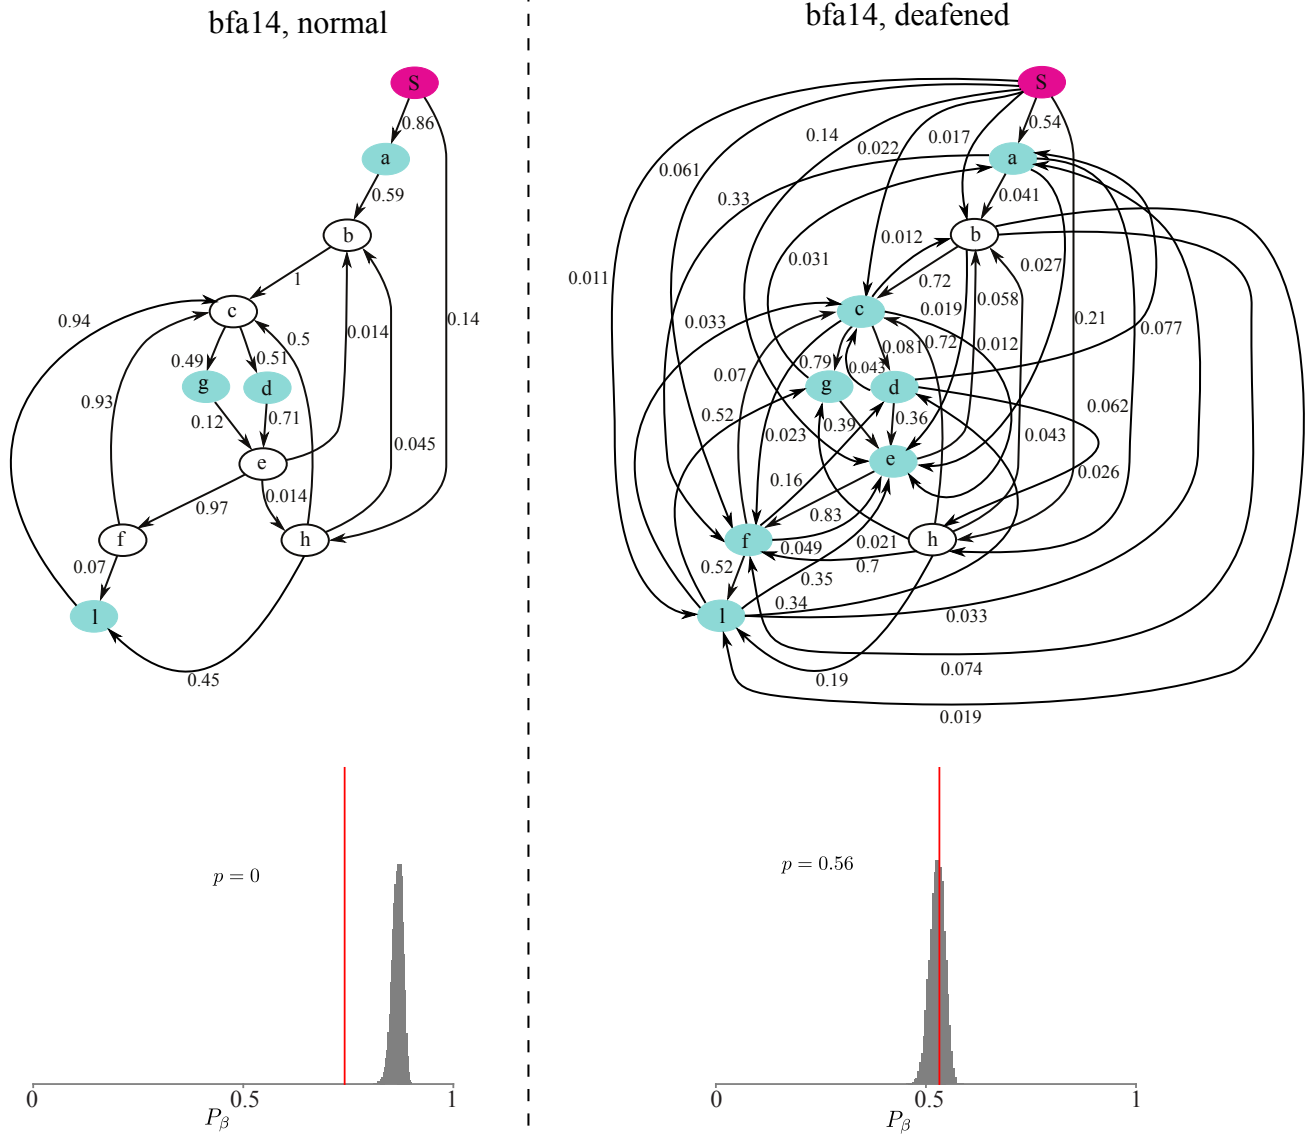

790

791

793

Fig. S5 (Supplementary) Test of Markov model for bird bfa14.

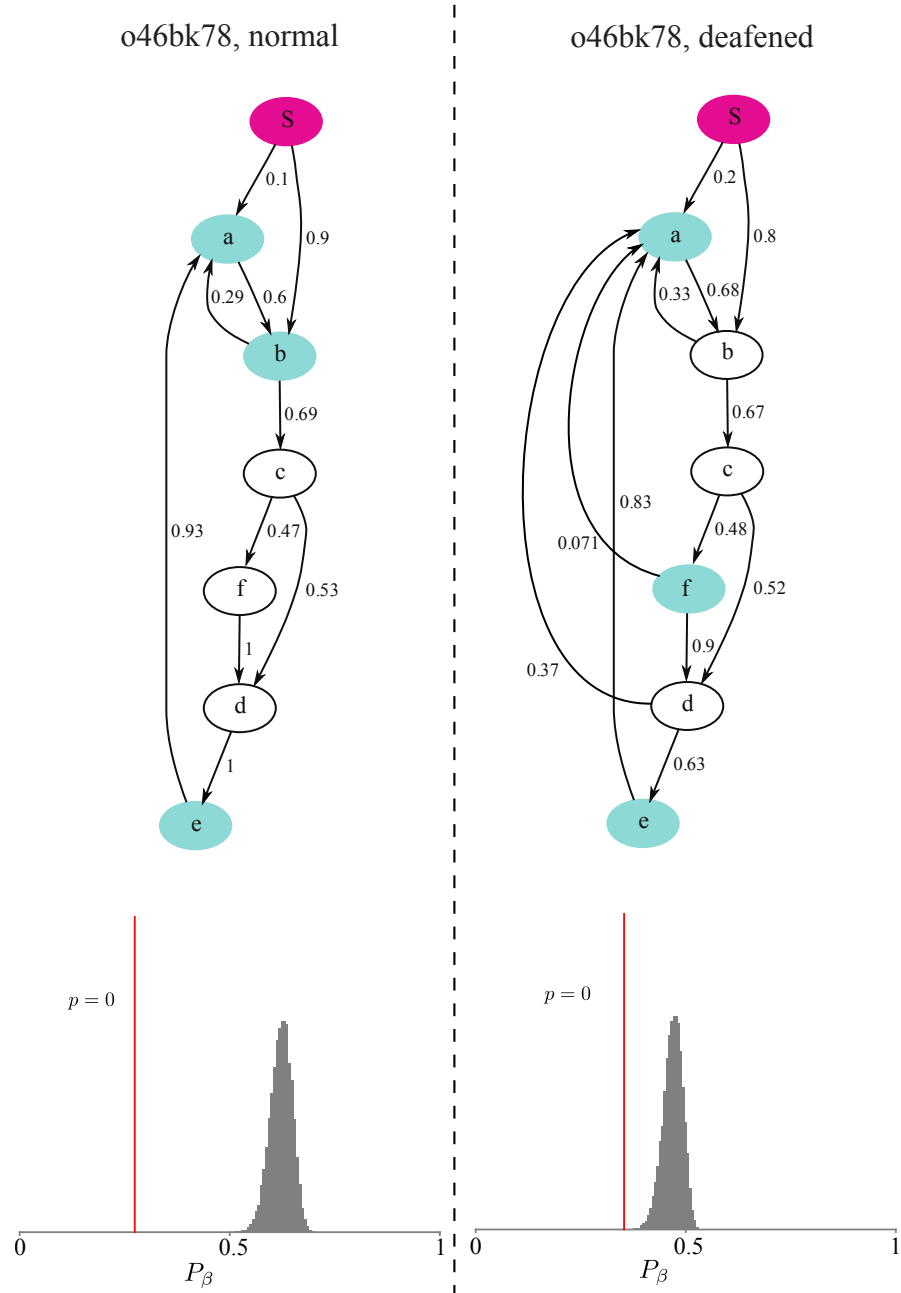

794

796

Fig. S6 (Supplementary) Test of Markov model for bird o46bk78.

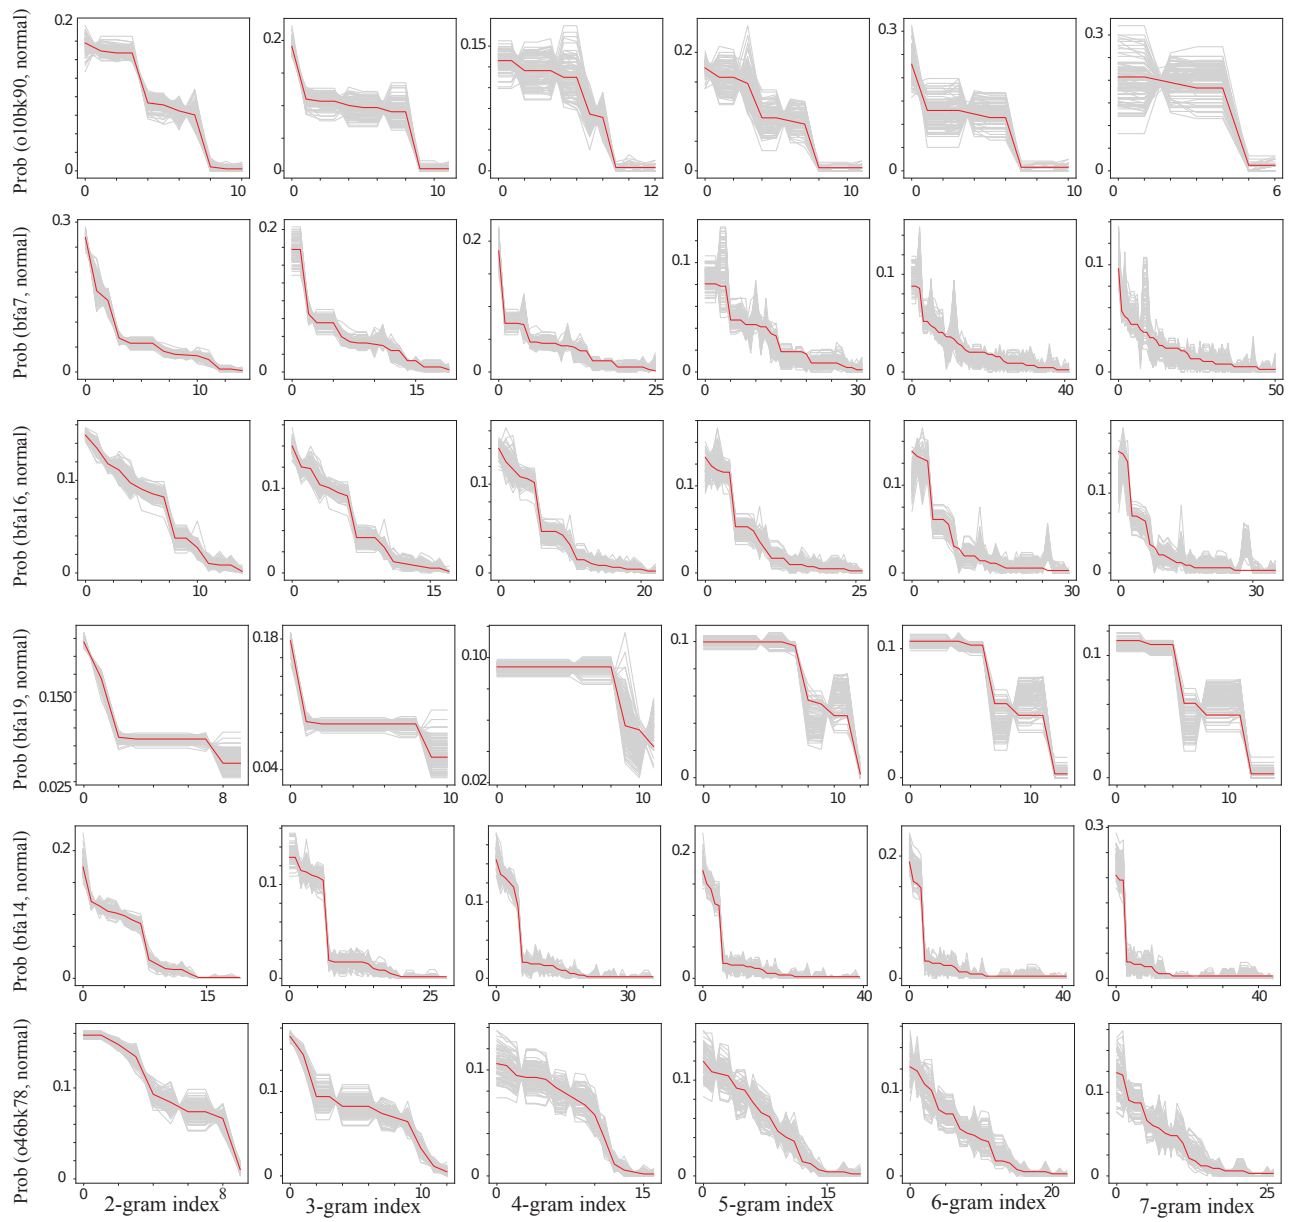

799 **Fig. S7 (Supplementary) Comparisons of N-gram distributions in normal hearing**  
800 **condition.**

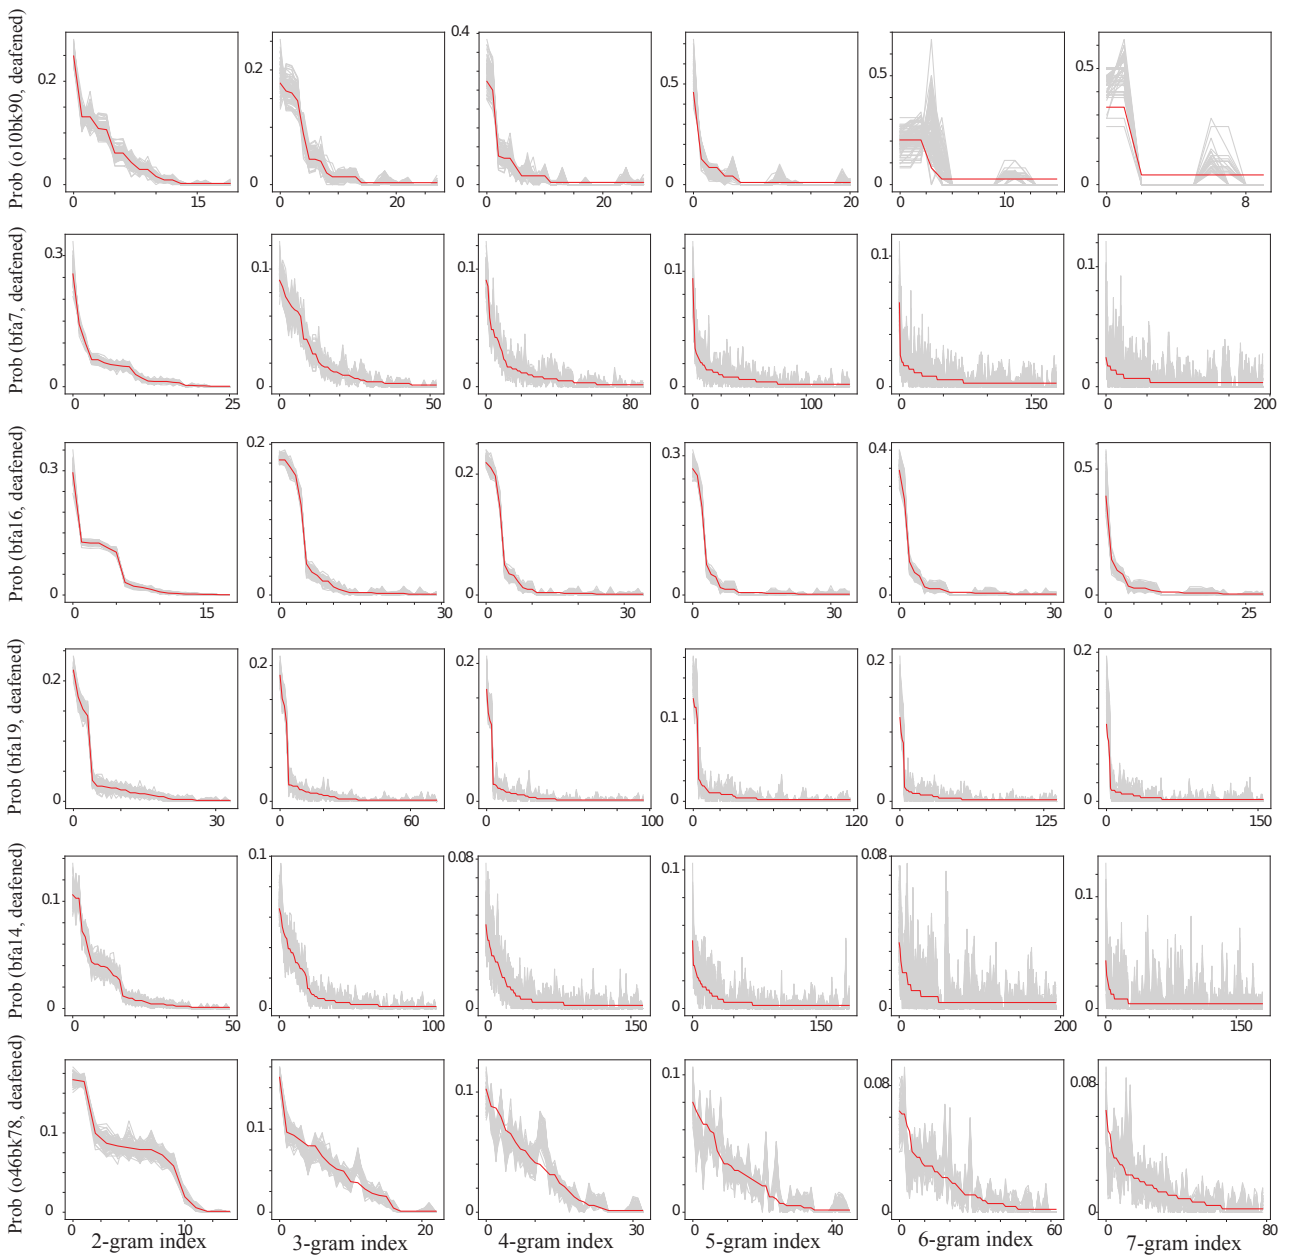

805 **Fig. S8 (Supplementary) Comparisons of N-gram distributions after deafening.**
